# Supplementary material
Source: MDPI journal article supplement (https://www.mdpi.com/2673-1924/1/3/9)
Supplement: s1 [file s1]

# Review of the scientific and institutional capacity in Small Island Developing States in support of a bottom up approach to achieve Sustainable Development Goal 14 targets

Rebecca Zitoun <sup>1,2,3,\*</sup>, Sylvia G. Sander <sup>4</sup>, Pere Masque <sup>4,5,6</sup>, Saul Perez Pijuan <sup>7</sup> and Peter W. Swarzenski <sup>4,\*</sup>

<sup>1</sup> Department of Botany, University of Otago, Dunedin 9054, New Zealand

<sup>2</sup> National Institute for Water and Atmospheric Research (NIWA)/University of Otago Research Centre for Oceanography, Dunedin 9054, New Zealand

<sup>3</sup> Department of Ocean Systems (OCS), Royal Netherlands Institute for Sea Research (NIOZ), and Utrecht University, 1790 AB Den Burg, The Netherlands

<sup>4</sup> International Atomic Energy Agency, 4a Quai Antoine 1er, 98000 Monaco, Monaco; s.sander@iaea.org (S.G.S.); p.masque-barri@iaea.org (P.M.)

<sup>5</sup> School of Science & Centre for Marine Ecosystems Research, Edith Cowan University, 270 Joondalup Drive, Joondalup, WA 6027, Australia

<sup>6</sup> Departament de Física & Institut de Ciència i Tecnologia Ambientals, Universitat Autònoma de Barcelona, 08193 Bellaterra, Spain

<sup>7</sup> International Atomic Energy Agency, Vienna International Centre, 1400 Vienna, Austria; S.Perez-Pijuan@iaea.org (S.P.P.)

\* Correspondence: rebecca.zitoun@outlook.com (R.Z) or rebecca.zitoun@nioz.nl (R.Z.); p.swarzenski@iaea.org (P.W.S)

## Figures

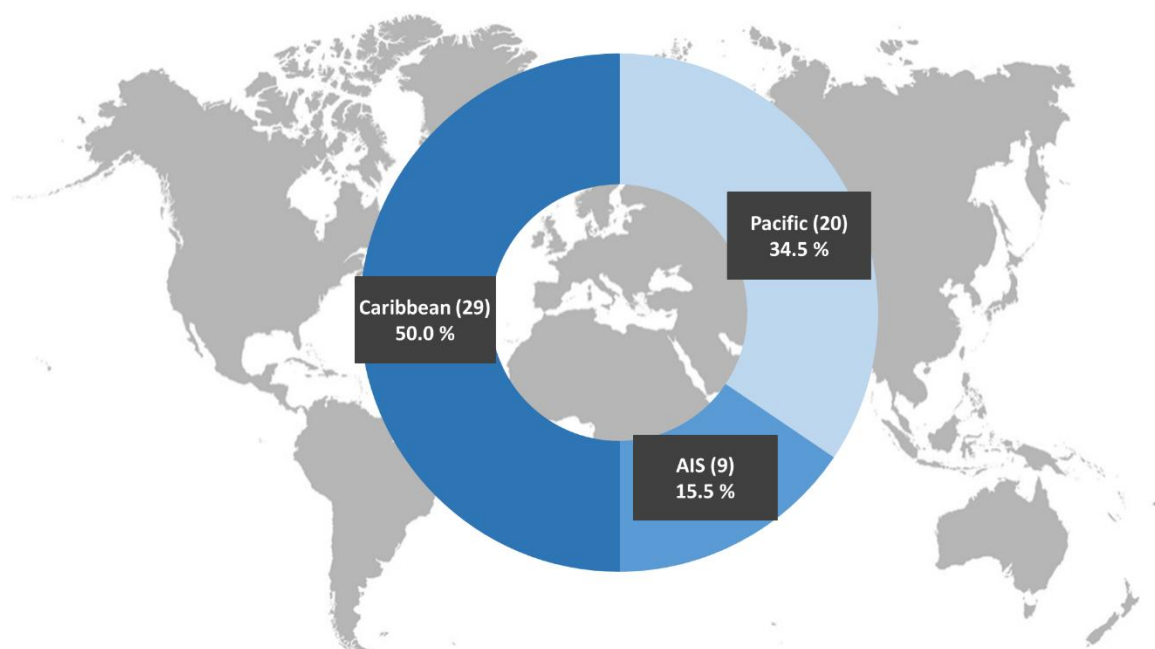

**Figure S1.** Geographical regions of Small Island Developing States (SIDS). The numbers in the brackets represent the amount of SIDS in each respective region. AIS: Atlantic, Indian Ocean and South China Seas.

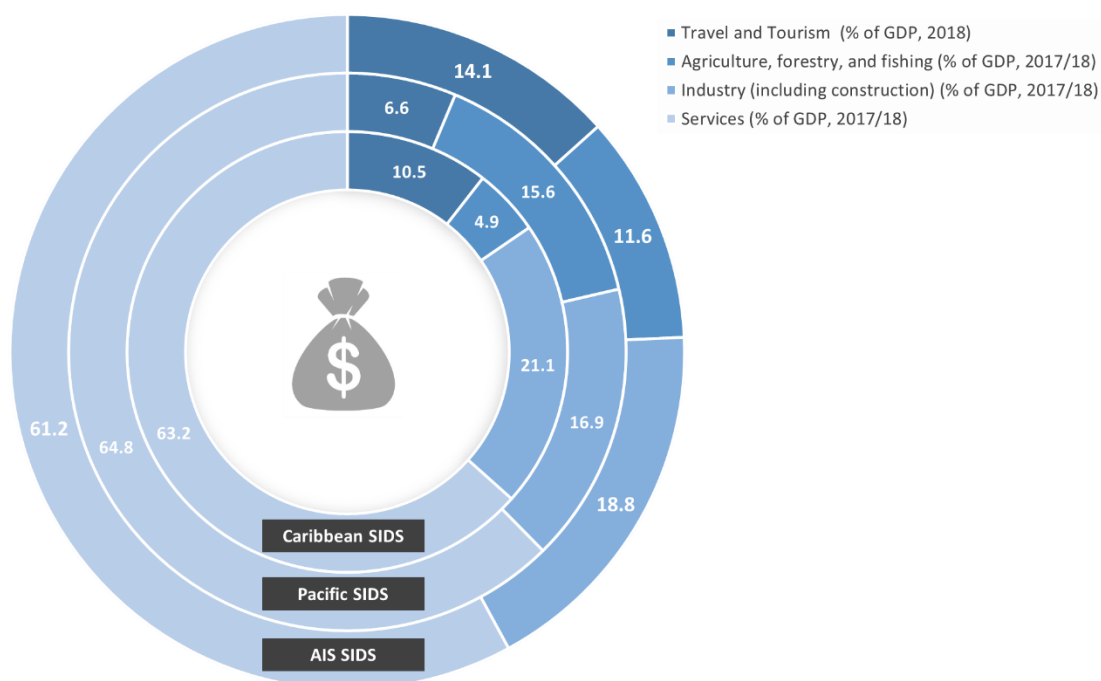

**Figure S2.** Average composition of the Gross Domestic Product (GDP) of Small Island Developing State (SIDS) regions by sectors as of 2017/2018 [1]. Note that (1) the sum of the sectors (% of GDP) sometimes exceeds 100 % due to data being pooled from available data in 2017 and 2018, and, (2) data is missing for some SIDS as stated in Table 1.

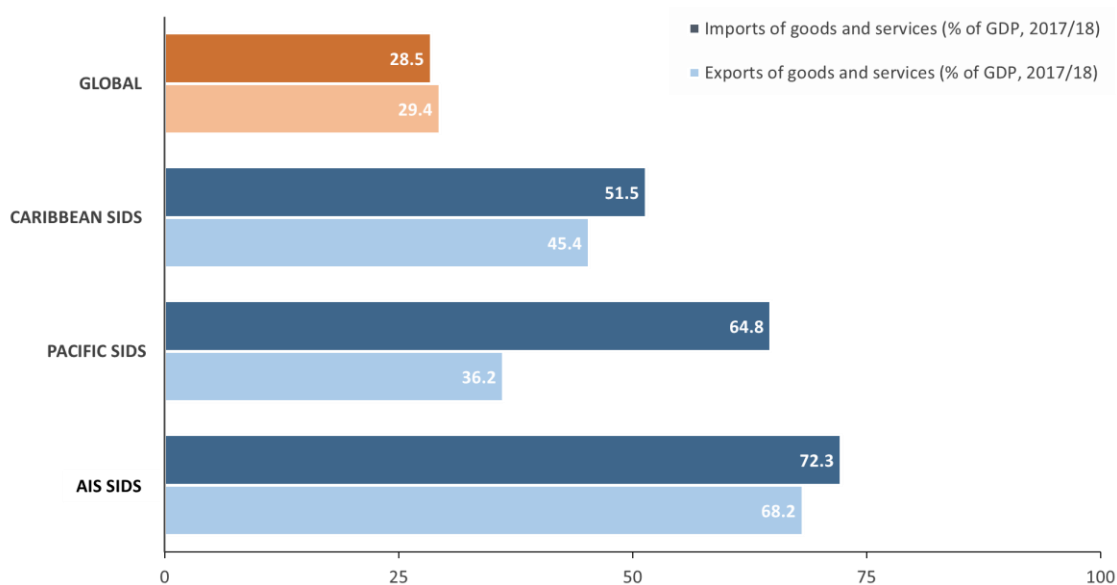

**Figure S3.** Average imports and exports as a percentage of the Gross Domestic Product (GDP) by Small Island Developing State (SIDS) regions [1]. Note that data is missing for some SIDS as stated in Table 1.

## Tables

**Table S1.** Targets of Sustainable Development Goal (SDG) 14 - Life Below Water [2].

|                    |                                                                       |                                                                                                                                                                                                                                                                                                                                                                                                                                                |
|--------------------|-----------------------------------------------------------------------|------------------------------------------------------------------------------------------------------------------------------------------------------------------------------------------------------------------------------------------------------------------------------------------------------------------------------------------------------------------------------------------------------------------------------------------------|
| <b>Target 14.1</b> | <b>Prevent and Reduce Marine Pollution</b>                            | By 2025, prevent and significantly reduce marine pollution of all kinds, particularly from land-based activities, including marine debris and nutrient pollution.                                                                                                                                                                                                                                                                              |
| <b>Target 14.2</b> | <b>Manage and Protect Marine and Coastal Ecosystems</b>               | By 2020, sustainably manage and protect marine and coastal ecosystems to avoid significant adverse impacts, including by strengthening their resilience, and take action for their restoration, to achieve healthy and productive oceans.                                                                                                                                                                                                      |
| <b>Target 14.3</b> | <b>Address Impacts of Ocean Acidification</b>                         | Minimize and address the impacts of ocean acidification, including through enhanced scientific cooperation at all levels.                                                                                                                                                                                                                                                                                                                      |
| <b>Target 14.4</b> | <b>Restore Fish Stocks</b>                                            | By 2020, effectively regulate harvesting, and end overfishing, illegal, unreported and unregulated (IUU) fishing and destructive fishing practices and implement science-based management plans, to restore fish stocks in the shortest time feasible at least to levels that can produce maximum sustainable yield as determined by their biological characteristics.                                                                         |
| <b>Target 14.5</b> | <b>Protect 10 % of Coastal and Marine Areas</b>                       | By 2020, conserve at least 10 per cent of coastal and marine areas, consistent with national and international law and based on best available scientific information.                                                                                                                                                                                                                                                                         |
| <b>Target 14.6</b> | <b>Reform Fishery Subsidies</b>                                       | By 2020, prohibit certain forms of fisheries subsidies which contribute to overcapacity and overfishing, and eliminate subsidies that contribute to IUU fishing, and refrain from introducing new such subsidies, recognizing that appropriate and effective special and differential treatment for developing and least developed countries should be an integral part of the World Trade Organization (WTO) fisheries subsidies negotiation. |
| <b>Target 14.7</b> | <b>Increase Benefits from the Sustainable Use of Marine Resources</b> | By 2030, increase the economic benefits to Small Island Developing States (SIDS) and Least Developed Countries (LDCs) from the sustainable use of marine resources, including through sustainable management of fisheries, aquaculture and tourism.                                                                                                                                                                                            |
| <b>Mean 14.a</b>   | <b>Increase Research Capacity and Marine Technology Transfer</b>      | Increase scientific knowledge, develop research capacities and transfer marine technology taking into account the Intergovernmental Oceanographic Commission Criteria and Guidelines on the Transfer of Marine Technology, in order to improve ocean health and to enhance the contribution of marine biodiversity to the development of developing countries, in particular SIDS and LDCs.                                                    |
| <b>Mean 14.b</b>   | <b>Provide Access to Resources and Markets for Small Fisheries</b>    | Provide access of small-scale artisanal fishers to marine resources and markets.                                                                                                                                                                                                                                                                                                                                                               |
| <b>Mean 14.c</b>   | <b>Implement the UN Convention Law of the Sea</b>                     | Ensure the full implementation of international law, as reflected in the United Nations Convention on the Law of the Sea (UNCLOS), which provides the legal framework for the conservation and sustainable use of oceans and their resources, as recalled in paragraph 158 of “The Future We Want”.                                                                                                                                            |

**Table S2.** List of Small Island Developing States (SIDS) separated into UN Members and Non-UN Members/Associate Members of Regional Commissions.

| UN Members                                               |           |
|----------------------------------------------------------|-----------|
| Island State                                             | Region    |
| Antigua and Barbuda                                      | Caribbean |
| Bahamas                                                  | Caribbean |
| Bahrain                                                  | AIS*      |
| Barbados                                                 | Caribbean |
| Belize                                                   | Caribbean |
| Cape Verde                                               | AIS*      |
| Comoros                                                  | AIS*      |
| Cuba                                                     | Caribbean |
| Dominica                                                 | Caribbean |
| Dominican Republic                                       | Caribbean |
| Federated States of Micronesia                           | Pacific   |
| Fiji                                                     | Pacific   |
| Grenada                                                  | Caribbean |
| Guinea-Bissau                                            | AIS*      |
| Guyana                                                   | Caribbean |
| Haiti                                                    | Caribbean |
| Jamaica                                                  | Caribbean |
| Kiribati                                                 | Pacific   |
| Maldives                                                 | AIS*      |
| Marshall Islands                                         | Pacific   |
| Mauritius                                                | AIS*      |
| Nauru                                                    | Pacific   |
| Palau                                                    | Pacific   |
| Papua New Guinea                                         | Pacific   |
| Samoa                                                    | Pacific   |
| Sao Tome and Principe                                    | AIS*      |
| Seychelles                                               | AIS*      |
| Singapore                                                | AIS*      |
| Solomon Islands                                          | Pacific   |
| St. Kitts and Nevis                                      | Caribbean |
| St. Lucia                                                | Caribbean |
| St. Vincent and the Grenadines                           | Caribbean |
| Suriname                                                 | Caribbean |
| Timor-Leste                                              | Pacific   |
| Tonga                                                    | Pacific   |
| Trinidad and Tobago                                      | Caribbean |
| Tuvalu                                                   | Pacific   |
| Vanuatu                                                  | Pacific   |
| Non-UN Members/Associate Members of Regional Commissions |           |
| American Samoa                                           | Pacific   |
| Anguilla                                                 | Caribbean |
| Aruba                                                    | Caribbean |
| Bermuda                                                  | Caribbean |
| British Virgin Islands                                   | Caribbean |
| Cayman Islands                                           | Caribbean |
| Commonwealth of Northern Marianas                        | Pacific   |
| Cook Islands                                             | Pacific   |
| Curacao                                                  | Caribbean |
| French Polynesia                                         | Pacific   |
| Guadeloupe                                               | Caribbean |
| Guam                                                     | Pacific   |
| Martinique                                               | Caribbean |
| Montserrat                                               | Caribbean |
| New Caledonia                                            | Pacific   |
| Niue                                                     | Pacific   |
| Puerto Rico                                              | Caribbean |
| Saint Marten                                             | Caribbean |
| Turks and Caicos Islands                                 | Caribbean |
| U.S. Virgin Islands                                      | Caribbean |

(Sources: [3]). \*AIS: Atlantic, Indian Ocean, and South China Seas.

**Table S3.** List of Small Island Developing States (SIDS) that participate in the Technical Cooperation (TC) Programme of the International Atomic Energy Agency (IAEA).

| Island State                  | Region    | Became an IAEA Member State (year) |
|-------------------------------|-----------|------------------------------------|
| Antigua and Barbuda           | Caribbean | 2015                               |
| Bahamas                       | Caribbean | 2014                               |
| Bahrain                       | AIS*      | 2009                               |
| Barbados                      | Caribbean | 2015                               |
| Belize                        | Caribbean | 2006                               |
| Cuba                          | Caribbean | 1957                               |
| Dominica                      | Caribbean | 2012                               |
| Dominican Republic            | Caribbean | 1957                               |
| Fiji                          | Pacific   | 2012                               |
| Grenada                       | Caribbean | 2018                               |
| Guyana                        | Caribbean | 2015                               |
| Haiti                         | Caribbean | 1957                               |
| Jamaica                       | Caribbean | 1965                               |
| Marshall Islands              | Pacific   | 1994                               |
| Mauritius                     | AIS*      | 1974                               |
| Palau                         | Pacific   | 2007                               |
| Papua New Guinea              | Pacific   | 2012                               |
| Seychelles                    | AIS*      | 2003                               |
| Singapore <sup>A</sup>        | AIS*      | 1967                               |
| St Lucia                      | Caribbean | 2019                               |
| St Vincent and the Grenadines | Caribbean | 2017                               |
| Trinidad and Tobago           | Caribbean | 2012                               |
| Vanuatu                       | Pacific   | 2015                               |

\*AIS: Atlantic, Indian Ocean, and South China Seas; A: Singapore is a member of the SIDS category, though not a recipient of funds, and neither a small nor a developing state [4].

**Table S4:** List of physiographic data of Small Island Developing States (SIDS) in the Caribbean region.

| Physiographic data                                                         | Anguilla | Antigua and Barbuda | Aruba  | Bahamas | Barbados | Belize * | Bermuda | British Virgin Islands | Cayman Islands | Cuba     |
|----------------------------------------------------------------------------|----------|---------------------|--------|---------|----------|----------|---------|------------------------|----------------|----------|
| Land area (km <sup>2</sup> )                                               | 91       | 440                 | 180    | 10010   | 430      | 22810    | 54.0    | 150                    | 240            | 104020   |
| Land area < 5 m above sea level (% total land area)                        | -        | 13.2                | 7.1    | 52.9    | 0.7      | 6.1      | 11.9    | 28.0                   | 11.7           | 8.5      |
| Total Islands and islets                                                   | 10       | 3                   | 1      | 700     | 1        | 450      | 181     | 60                     | 3              | 5        |
| Coastline (km)                                                             | 61       | 153                 | 68.5   | 3542    | 97       | 386      | 103     | 80                     | 160            | 3735     |
| Population (2018)                                                          | 17422    | 96286               | 105845 | 385640  | 286641   | 383071   | 63968   | 29802                  | 64174          | 11338138 |
| Population living in areas < 5 m above sea level (% of total population)   | -        | 11.8                | 7.1    | 20.3    | 0.7      | 20.5     | 11.9    | 12.0                   | 12.1           | 2.9      |
| Population density (people/km <sup>2</sup> of land area, 2018)             | -        | 218.8               | 588.0  | 38.5    | 666.6    | 16.8     | 1184.6  | 198.7                  | 267.4          | 109.0    |
| Water area (km <sup>2</sup> )                                              | 0        | 0                   | 0      | 3870    | 0        | 160      | 0       | 0                      | 0              | 1040     |
| EEZ (km <sup>2</sup> )                                                     | 92178    | 107939              | 25199  | 628026  | 183773   | 36182    | 450347  | 80111                  | 119134         | 364511   |
| Agricultural land (% of land area, 2016)                                   | 0.00     | 20.5                | 11.1   | 1.4     | 23.3     | 7.0      | 5.6     | 46.7                   | 11.3           | 59.9     |
| Forest area (% of land area, 2016)                                         | 61.10    | 22.3                | 2.3    | 51.4    | 14.7     | 59.7     | 18.5    | 24.1                   | 52.9           | 31.3     |
| Tropical Coral Reefs (% of world)                                          | 0.006    | 0.064               | 0.007  | 1.015   | 0.022    | 0.413    | 0.107   | 0.079                  | 0.047          | 0.887    |
| Species (Animalia and Plants, 2019)                                        | 1472     | 1677                | 1328   | 2211    | 1676     | 3073     | 1313    | 1681                   | 1570           | 2864     |
| Bird species, threatened (2018)                                            | -        | 3                   | 2      | 10      | 4        | 6        | 3       | 3                      | 3              | 19       |
| Fish species, threatened (2018)                                            | -        | 31                  | 24     | 43      | 29       | 45       | 27      | 31                     | 31             | 44       |
| Mammal species, threatened (2018)                                          | -        | 2                   | 2      | 5       | 3        | 10       | 4       | 1                      | 1              | 10       |
| Plant species, threatened (2018)                                           | -        | 4                   | 2      | 7       | 3        | 46       | 8       | 20                     | 22             | 179      |
| Marine protected areas (% of territorial waters, 2018)                     | -        | 0.18                | 0.00   | 7.92    | 0.01     | 10.08    | 0.00    | 0.00                   | 0.08           | 4.32     |
| Terrestrial and marine protected areas (% of total territorial area, 2018) | -        | 0.26                | 0.14   | 8.56    | 0.01     | 20.59    | 0.00    | 0.02                   | 0.10           | 7.18     |

| Physiographic data                                                         | Curacao | Dominica | D.<br>Republic | Grenada | Guadeloupe | Guyana * | Haiti    | Jamaica | Martinique | Montserrat | Puerto Rico |
|----------------------------------------------------------------------------|---------|----------|----------------|---------|------------|----------|----------|---------|------------|------------|-------------|
| Land area (km <sup>2</sup> )                                               | 444     | 750      | 48310          | 340     | 1780       | 196850.0 | 27560    | 10830   | 1100       | 102        | 8870        |
| Land area < 5 m above sea level (% total land area)                        | -       | 1.7      | 0.8            | 1.8     |            | 2.4      | 1.6      | 3.6     | -          | -          | 5.7         |
| Total Islands and islets                                                   | 6       | 1        | 11             | 6       | 12         | *        | 7        | 10      | 1          | 4          | 6           |
| Coastline (km)                                                             | 364     | 148      | 1288           | 121     | 306        | 459      | 1771     | 1022    | 350        | 40         | 501         |
| Population (2018)                                                          | 159849  | 71625    | 10627165       | 111454  | -          | 779004   | 11123176 | 2934855 | -          | 5315       | 3195153     |
| Population living in areas < 5 m above sea level (% of total population)   | -       | 1.0      | 1.2            | 1.9     | -          | 27.9     | 1.9      | 3.6     | -          | -          | 8.9         |
| Population density (people/km <sup>2</sup> of land area, 2018)             | 360.8   | 95.5     | 220.0          | 327.8   | -          | 4.0      | 403.6    | 271.0   | -          | -          | 360.2       |
| Water area (km <sup>2</sup> )                                              | 0       | 0        | 350            | 0       | -          | 18120    | 190      | 160     | -          | 0          | 145         |
| EEZ (km <sup>2</sup> )                                                     | 30427   | 28593    | 269486         | 26133   | 90570      | 140369   | 123525   | 263284  | 47372      | 7586       | 177327      |
| Agricultural land (% of land area, 2016)                                   | 10.0    | 33.3     | 48.7           | 23.5    | --         | 8.6      | 66.8     | 41.0    | -          | 30.0       | 22.3        |
| Forest area (% of land area, 2016)                                         | 0.0     | 57.4     | 41.7           | 50.0    | -          | 83.9     | 3.5      | 30.9    | -          | 25.0       | 56.3        |
| Tropical Coral Reefs (% of world)                                          | 0.029   | 0.011    | 0.151          | 0.034   | 0.051      | 0        | 0.123    | 0.328   | 0.047      | 0          | 0.128       |
| Species (Animalia and Plants, 2019)                                        | 1386    | 1771     | 2247           | 1635    | 1763       | 3455     | 2218     | 2365    | 1617       | 1522       | 2210        |
| Bird species, threatened (2018)                                            | 2       | 7        | 17             | 2       | -          | 16       | 17       | 11      | -          | -          | 11          |
| Fish species, threatened (2018)                                            | 28      | 31       | 29             | 29      | -          | 33       | 30       | 30      | -          | -          | 32          |
| Mammal species, threatened (2018)                                          | 3       | 3        | 7              | 3       | -          | 11       | 4        | 7       | -          | -          | 2           |
| Plant species, threatened (2018)                                           | 2       | 12       | 47             | 3       | -          | 30       | 93       | 215     | -          | -          | 64          |
| Marine protected areas (% of territorial waters, 2018)                     | 0.03    | 0.11     | 17.96          | 0.09    | -          | 0.01     | 0.00     | 0.75    | -          | -          | 1.75        |
| Terrestrial and marine protected areas (% of total territorial area, 2018) | 0.26    | 0.67     | 19.22          | 0.22    | -          | 5.31     | 0.35     | 1.41    | -          | -          | 2.02        |

| Physiographic data                                                         | St<br>Martin | St. Kitts<br>and Nevis | St. Lucia | St. Vincent and<br>the Grenadines | Suriname * | Trinidad<br>and Tobago | Turks and<br>Caicos Islands | U.S. Virgin<br>Islands |
|----------------------------------------------------------------------------|--------------|------------------------|-----------|-----------------------------------|------------|------------------------|-----------------------------|------------------------|
| Land area (km <sup>2</sup> )                                               | 54.4         | 260                    | 610       | 390                               | 156000     | 5130                   | 950.0                       | 350                    |
| Land area < 5 m above sea level (% total land area)                        | -            | 3.8                    | 1.6       | 3.4                               | 2.7        | 2.7                    | 55.9                        | 6.6                    |
| Total Islands and islets                                                   | 1            | 2                      | 1         | 33                                | *          | 2                      | 40                          | 54                     |
| Coastline (km)                                                             | 58.9         | 135                    | 158       | 84                                | 386        | 362                    | 389                         | 188                    |
| Population (2018)                                                          | 37264        | 52441                  | 181889    | 110210                            | 575991     | 1389858                | 37665                       | 106977                 |
| Population living in areas < 5 m above sea level (% of total population)   | -            | 3.9                    | 1.6       | 3.7                               | 56.2       | 2.9                    | 48.4                        | 5.4                    |
| Population density (people/km <sup>2</sup> of land area, 2018)             | 672.1        | 201.7                  | 298.2     | 282.6                             | 3.7        | 270.9                  | 39.6                        | 305.6                  |
| Water area (km <sup>2</sup> )                                              | 0            | 0                      | 10        | 0                                 | 7820       | 0                      | 0                           | 1564                   |
| EEZ (km <sup>2</sup> )                                                     | 1066         | 10209                  | 15472     | 36304                             | 127817     | 79798                  | 153533                      | 33748                  |
| Agricultural land (% of land area, 2016)                                   | -            | 23.1                   | 17.4      | 25.6                              | 0.6        | 10.5                   | 1.1                         | 11.4                   |
| Forest area (% of land area, 2016)                                         | 18.4         | 42.3                   | 33.2      | 69.2                              | 98.3       | 46.0                   | 36.2                        | 50.0                   |
| Tropical Coral Reefs (% of world)                                          | 0.011        | 0.033                  | 0.025     | 0.035                             | 0          | 0.013                  | 1.628                       | 0.049                  |
| Species (Animalia and Plants, 2019)                                        | 1315         | 1586                   | 1693      | 1718                              | 3073       | 2595                   | 1525                        | 1677                   |
| Bird species, threatened (2018)                                            | 1            | 3                      | 7         | 4                                 | 9          | 5                      | 4                           | 3                      |
| Fish species, threatened (2018)                                            | 31           | 30                     | 30        | 29                                | 32         | 37                     | 30                          | 29                     |
| Mammal species, threatened (2018)                                          | 2            | 2                      | 2         | 2                                 | 9          | 2                      | 2                           | 1                      |
| Plant species, threatened (2018)                                           | 3            | 2                      | 7         | 6                                 | 27         | 50                     | 9                           | 17                     |
| Marine protected areas (% of territorial waters, 2018)                     | 96.40        | 0.17                   | 0.22      | 0.22                              | 1.54       | 0.05                   | 0.10                        | 0.85                   |
| Terrestrial and marine protected areas (% of total territorial area, 2018) | 91.99        | 0.25                   | 0.93      | 0.47                              | 8.48       | 2.01                   | 0.39                        | 0.98                   |

(Sources: [1,5]); -: No data available; \*: defined as a country not an island.



**Table S5.** List of physiographic data of Small Island Developing States (SIDS) in the Pacific region.

| Physiographic data                                                         | American Samoa | Northern Marianas | Cook Islands | F.S. of Micronesia | Fiji    | French Polynesia | Guam   | Kiribati | Marshall Islands | Nauru  | New Caledonia |
|----------------------------------------------------------------------------|----------------|-------------------|--------------|--------------------|---------|------------------|--------|----------|------------------|--------|---------------|
| Land area (km <sup>2</sup> )                                               | 200            | 464               | 236          | 702                | 18270   | 3660             | 540    | 810      | 180              | 20     | 18280         |
| Land area < 5 m above sea level (% total land area)                        | 3.6            | 3.1               | -            | 7.2                | 3.1     | 19.9             | 1.6    | 54.6     | 43.8             | 7.6    | 2.9           |
| Total Islands and islets                                                   | 7              | 14                | 15           | 607                | 830     | 118              | 1      | 32       | 1156             | 1      | 4             |
| Coastline (km)                                                             | 116            | 1482              | 120          | 6122               | 1129    | 2525             | 125.5  | 1143     | 370.4            | 30     | 2254          |
| Population (2018)                                                          | 55465          | 51994             | 9038         | 103643             | 883483  | 277679           | 165768 | 115847   | 58413            | 12704  | 284060        |
| Population living in areas < 5 m above sea level (% of total population)   | 3.3            | -                 | -            | -                  | 4.9     | 5.0              | 1.2    | 20.6     | 35.9             | 7.6    | 14.0          |
| Population density (people/km <sup>2</sup> of land area, 2018)             | 277.3          | -                 | -            | -                  | 48.4    | 75.9             | 307.0  | 143.0    | 324.5            | 635.2  | 15.5          |
| Water area (km <sup>2</sup> )                                              | 0              | 0                 | 0            | 0                  | 0       | 340              | 0      | 0        | 0                | 0      | 300           |
| EEZ (km <sup>2</sup> )                                                     | 404241         | 748867            | 1960027      | 2992415            | 1281703 | 4771088          | 221899 | 3441810  | 1992022          | 308506 | 1422596       |
| Agricultural land (% of land area, 2016)                                   | 24.50          | 6.60              | 8.40         | -                  | 23.26   | 12.43            | 33.33  | 41.98    | 63.89            | 20.00  | 10.08         |
| Forest area (% of land area, 2016)                                         | 87.50          | 65.50             | 64.60        | -                  | 55.94   | 42.35            | 46.30  | 15.00    | 70.22            | 0.00   | 45.90         |
| Tropical Coral Reefs (% of world)                                          | 0.07           | 0.009             | 0.368        | 1.543              | 3.053   | 1.679            | 0.036  | 1.289    | 2.442            | 0.009  | 2.154         |
| Species (Animalia and Plants, 2019)                                        | 1507           | 1593              | 1244         | 2128               | 2595    | 1880             | 1563   | 1558     | 1624             | 1282   | 3375          |
| Bird species, threatened (2018)                                            | 8              | -                 | -            | -                  | 14      | 35               | 14     | 6        | 4                | 2      | 17            |
| Fish species, threatened (2018)                                            | 12             | -                 | -            | -                  | 20      | 28               | 14     | 14       | 18               | 11     | 37            |
| Mammal species, threatened (2018)                                          | 1              | -                 | -            | -                  | 7       | 0                | 3      | 2        | 1                | 2      | 9             |
| Plant species, threatened (2018)                                           | 1              | -                 | -            | -                  | 78      | 48               | 5      | 0        | 0                | 0      | 350           |
| Marine protected areas (% of territorial waters, 2018)                     | 8.72           | -                 | -            | -                  | 0.92    | 0.004            | 0.009  | 11.81    | -                | 0.27   | 96.59         |
| Terrestrial and marine protected areas (% of total territorial area, 2018) | 8.72           | -                 | -            | -                  | 0.99    | 0.006            | 0.071  | 11.82    | -                | 0.27   | 96.01         |

| Physiographic data                                                         | Niue   | Palau  | Papua New Guinea | Samoa  | Solomon Islands | Timor-Leste | Tonga  | Tuvalu | Vanuatu |
|----------------------------------------------------------------------------|--------|--------|------------------|--------|-----------------|-------------|--------|--------|---------|
| Land area (km <sup>2</sup> )                                               | 260    | 460    | 452860           | 2830   | 27990           | 14870       | 720    | 30     | 12190   |
| Land area < 5 m above sea level (% total land area)                        |        | 1.97   | 0.47             | 0.37   | 1.62            | 0.67        | 7.35   | 32.65  | 0.83    |
| Total Islands and islets                                                   | 1      | 340    | 600              | 9      | 906             | 2           | 172    | 124    | 80      |
| Coastline (km)                                                             | 64     | 1519   | 5152             | 403    | 5313            | 702         | 419    | 24     | 2528    |
| Population (2018)                                                          | 1618   | 17907  | 8606316          | 196130 | 652858          | 1267972     | 103197 | 11508  | 292680  |
| Population living in areas < 5 m above sea level (% of total population)   | -      | 3.5    | 0.49             | 1.4    | 2.8             | 0.9         | 7.5    | 47.5   | 1.2     |
| Population density (people/km <sup>2</sup> of land area, 2018)             | -      | 38.93  | 19.00            | 69.30  | 23.32           | 85.27       | 143.33 | 383.60 | 24.01   |
| Water area (km <sup>2</sup> )                                              | 0      | 0      | 9980             | 10     | 910             | 0           | 30     | 0      | 0       |
| EEZ (km <sup>2</sup> )                                                     | 316584 | 604253 | 2396575          | 131535 | 1596464         | 77051       | 664751 | 751672 | 827626  |
| Agricultural land (% of land area, 2016)                                   | 25.50  | 10.87  | 2.63             | 12.37  | 3.86            | 25.55       | 45.83  | 60.00  | 15.34   |
| Forest area (% of land area, 2016)                                         | 74.50  | 87.61  | 74.10            | 60.42  | 77.86           | 45.38       | 12.50  | 33.33  | 36.10   |
| Tropical Coral Reefs (% of world)                                          | 0.049  | 0.362  | 4.741            | 0.138  | 1.667           | 0.152       | 0.49   | 0.347  | 0.779   |
| Species (Animalia and Plants, 2019)                                        | 1049   | 2343   | 5848             | 1666   | 2963            | 1545        | 1678   | 1261   | 2240    |
| Bird species, threatened (2018)                                            | -      | 6      | 39               | 6      | 24              | 6           | 5      | 1      | 8       |
| Fish species, threatened (2018)                                            | -      | 21     | 61               | 16     | 24              | 13          | 16     | 13     | 18      |
| Mammal species, threatened (2018)                                          | -      | 4      | 41               | 2      | 19              | 5           | 2      | 2      | 8       |
| Plant species, threatened (2018)                                           | -      | 5      | 179              | 2      | 16              | 2           | 5      | 0      | 10      |
| Marine protected areas (% of territorial waters, 2018)                     | -      | 82.99  | 0.19             | 0.09   | 0.12            | 1.37        | 1.51   | 0.008  | 0.007   |
| Terrestrial and marine protected areas (% of total territorial area, 2018) | -      | 82.94  | 0.66             | 0.24   | 0.16            | 4.42        | 1.52   | 0.008  | 0.09    |

(Sources: [1,5]); -: No data available.

**Table S6.** List of physiographic data of Small Island Developing States (SIDS) in the Atlantic, Indian Ocean, and South China Seas (AIS) region.

| Physiographic data                                                          | Bahrain | Cape Verde | Comoros | Guinea-Bissau * | Maldives | Mauritius | Sao Tome & Principe | Seychelles | Singapore |
|-----------------------------------------------------------------------------|---------|------------|---------|-----------------|----------|-----------|---------------------|------------|-----------|
| Land area (km <sup>2</sup> )                                                | 778.0   | 4030.0     | 1861.0  | 28120.0         | 300.0    | 2030.0    | 960.0               | 460.0      | 709.0     |
| Land area < 5 m above sea level (% total land area)                         | 34.0    | 3.6        | 0.8     | 6.5             | 45.5     | 1.3       | 0.9                 | 16.4       | 8.2       |
| Total Islands and islets                                                    | 84      | 18         | 3       | *               | 1197     | 50        | 2                   | 115        | 64        |
| Coastline (km)                                                              | 161     | 965        | 340     | 350             | 644      | 177       | 209                 | 491        | 193       |
| Population (2018)                                                           | 1569439 | 543767     | 832322  | 1874309         | 515696   | 1265303   | 211028              | 96762      | 5638676   |
| Population living in areas < 5 m above sea level (% of total population)    | 34.3    | 5.6        | 0.7     | 15.3            | 48.2     | 1.4       | 1.3                 | 16.6       | 10.3      |
| Population density (people/km <sup>2</sup> of land area, 2018)              | 2017.3  | 134.9      | 447.2   | 66.7            | 1719.0   | 623.3     | 219.8               | 210.4      | 7953.0    |
| Water area (km <sup>2</sup> )                                               | 0       | 0          | 0       | 8005            | 0        | 10        | 0                   | 0          | 10        |
| EEZ (km <sup>2</sup> )                                                      | 8826    | 796555     | 164643  | 105839          | 916011   | 1272765   | 165345              | 1331964    | 673       |
| Agricultural land (% of land area, 2016)                                    | 11.1    | 19.6       | 71.5    | 58.0            | 26.3     | 42.4      | 50.7                | 3.4        | 0.9       |
| Forest area (% of land area, 2016)                                          | 0.8     | 22.5       | 19.7    | 69.8            | 3.3      | 19.0      | 55.8                | 88.4       | 23.1      |
| Tropical Coral Reefs (% of world)                                           | 0.262   | 0.081      | 0.083   | 0               | 2.797    | 0.3       | 0.034               | 0.459      | 0.012     |
| Species (Animalia and Plants, 2019)                                         | 863     | 1298       | 1744    | 2180            | 1636     | 2201      | 1164                | 2477       | 2926      |
| Bird species, threatened (2018)                                             | 7       | 7          | 14      | 12              | 0        | 12        | 12                  | 13         | 22        |
| Fish species, threatened (2018)                                             | 14      | 35         | 11      | 41              | 24       | 21        | 25                  | 24         | 29        |
| Mammal species, threatened (2018)                                           | 3       | 4          | 5       | 14              | 2        | 7         | 4                   | 6          | 14        |
| Plant species, threatened (2018)                                            | 0       | 51         | 9       | 6               | 0        | 91        | 49                  | 61         | 62        |
| Marine protected areas (% of territorial waters, 2018)                      | 1.24    | 0.00       | 0.02    | 10.01           | 0.05     | 0.00      | 0.03                | 0.04       | 0.01      |
| Terrestrial and marine protected areas (% of total territorial area) - 2018 | 1.69    | 0.02       | 0.13    | 11.62           | 0.05     | 0.01      | 0.24                | 0.05       | 2.46      |

(Sources: [1,5]); \*: defined as a country not an island.

**Table S7.** List of existing tertiary education institutional capacities in UN Small Island Developing States (SIDS).

| Island State        | Region    | Institution                                                   | Departments/Divisions/Faculties/Schools/Centres                                                                                                                                                                                                                                                                                                                                                                                                                                                                                            | Programs/Courses relevant for Marine Science                                                                                                                             | Instruments                                                                                                                                                                                                                                                                                                                                                                                              |
|---------------------|-----------|---------------------------------------------------------------|--------------------------------------------------------------------------------------------------------------------------------------------------------------------------------------------------------------------------------------------------------------------------------------------------------------------------------------------------------------------------------------------------------------------------------------------------------------------------------------------------------------------------------------------|--------------------------------------------------------------------------------------------------------------------------------------------------------------------------|----------------------------------------------------------------------------------------------------------------------------------------------------------------------------------------------------------------------------------------------------------------------------------------------------------------------------------------------------------------------------------------------------------|
| Antigua and Barbuda | Caribbean | American University of Antigua                                | Medical School                                                                                                                                                                                                                                                                                                                                                                                                                                                                                                                             |                                                                                                                                                                          | no info                                                                                                                                                                                                                                                                                                                                                                                                  |
| Antigua and Barbuda | Caribbean | Antigua State College                                         | Liberal Arts; Business, Continuing Education; Industrial Technology; Teacher Education; Pharmacy, Nursing; Undergraduate Studies                                                                                                                                                                                                                                                                                                                                                                                                           |                                                                                                                                                                          | no info                                                                                                                                                                                                                                                                                                                                                                                                  |
| Antigua and Barbuda | Caribbean | The Antigua and Barbuda International Institute of Technology | Architectural Technology; Accounting; Architecture; Banking and Finance; Business Administration; Computer Information System; Computer Network Engineer; Computer Network Technician. Computer Programmer; Computer Repair Technician; Computer Science; Electronic Engineering Tech; Electronic Technology; Graphic Design; Human Resource Management; Information technology; Office Management; Office Specialist; Office Specialist Civil Servant; Office Specialist; PC Technician; Sales and Marketing; Webmaster; Website Designer |                                                                                                                                                                          | no info                                                                                                                                                                                                                                                                                                                                                                                                  |
| Antigua and Barbuda | Caribbean | University of Health Science Antigua                          | Medical School; Nursing                                                                                                                                                                                                                                                                                                                                                                                                                                                                                                                    |                                                                                                                                                                          | no info                                                                                                                                                                                                                                                                                                                                                                                                  |
| Antigua and Barbuda | Caribbean | Caribbean Agricultural Research and Development Institute     | Agronomy, Genetics, Entomology, Plant Pathology, Plant Breeder, Seed Technology, Horticulture, Post-Harvest Technology, Soil Management, Livestock Science, Biotechnology, Biometrics, Market Research, Water and Soil Management, Climate Change                                                                                                                                                                                                                                                                                          | Agronomy, Biotechnology, Biometrics, Water and Soil Management, Climate Change                                                                                           | no info                                                                                                                                                                                                                                                                                                                                                                                                  |
| Bahamas             | Caribbean | The University of the Bahamas                                 | Continuing Education and Extension Services, Culinary and Hospitality Management, International Languages and Cultures; Business; School of Chemistry, Environmental and Life Sciences; Communication and Creative Arts; Education; English Studies; Mathematics, Physics and Technology; Nursing and Allied Health; Social Sciences, Hospitality and Tourism, Social Science                                                                                                                                                              | Biology, Chemistry, Marine Science, Geology, Environmental Science, Life Science, Sustainable Development, Natural Resources, Small Island Sustainability, Water Science | A wet lab with sea water aquaria, Shimadzu Total Organic Carbon Analyser TOC-5050A, Hach Spectrophotometer Model DR2700, Pharmacia LKB Novaspec II spectrophotometer, Barnstead EasyPure II Water System (18.2 MΩ), YSI Salinity, Conductivity, and Temperature Probe Model 30, YSI Dissolved Oxygen Probe Model 55, Hanna Bench pH and Temperature Meter Model pH210, LW Scientific LW200 M-Series Epi- |

|         |           |                                                                      |                                                                                                                                                                                                                                                                                                                                                                                              |                                                                        |                                                                                                                                                                                                                                                            |
|---------|-----------|----------------------------------------------------------------------|----------------------------------------------------------------------------------------------------------------------------------------------------------------------------------------------------------------------------------------------------------------------------------------------------------------------------------------------------------------------------------------------|------------------------------------------------------------------------|------------------------------------------------------------------------------------------------------------------------------------------------------------------------------------------------------------------------------------------------------------|
|         |           |                                                                      |                                                                                                                                                                                                                                                                                                                                                                                              |                                                                        | Fluorescent LabScope, BioVID Digital Color CCD Microscope Camera, Thermo Multiskan EX Photometric Microplate Absorbance Reader, Centrifuge, Incubator, Autoclave, Saniclave, Balance, Vortexer, Hot Plate, Fume Hood, Microscopes, Pipettes, Digital Sonar |
| Bahamas | Caribbean | Bahamas Baptist Community College                                    | Early Childhood Education, Primary Education, Accounting, Biology, Biology and Chemistry, Computer Information System, Human Resource Management, Law and Criminal Justice, Management, Marketing, Psychology, Sociology, Public Administration                                                                                                                                              | Biology and Chemistry                                                  | no info                                                                                                                                                                                                                                                    |
| Bahamas | Caribbean | Eugene Dupuch Law School                                             |                                                                                                                                                                                                                                                                                                                                                                                              |                                                                        | no info                                                                                                                                                                                                                                                    |
| Bahamas | Caribbean | Galilee College                                                      | Accounting, Business Administration, Banking, Economics                                                                                                                                                                                                                                                                                                                                      |                                                                        | no info                                                                                                                                                                                                                                                    |
| Bahamas | Caribbean | Manley and Wooding Law School                                        |                                                                                                                                                                                                                                                                                                                                                                                              |                                                                        | no info                                                                                                                                                                                                                                                    |
| Bahamas | Caribbean | Success Training College                                             |                                                                                                                                                                                                                                                                                                                                                                                              |                                                                        | no info                                                                                                                                                                                                                                                    |
| Bahamas | Caribbean | University of West Indies (Bahamas Office)                           | Company Law and Management, Computer Application, Spanish, Law for small businesses and entrepreneurs, business ethics, Managing projects for success, Law for health care practitioners, Finance, Law for Hr Managers, Introduction to Counselling, Marketing, Industrial Relations, Introduction to small business and entrepreneurship, Advanced supervisory management, Costumer service |                                                                        | no info                                                                                                                                                                                                                                                    |
| Bahamas | Caribbean | Bahamas Caves Research Foundation                                    |                                                                                                                                                                                                                                                                                                                                                                                              | Marine caves and blue holes                                            | no info                                                                                                                                                                                                                                                    |
| Bahamas | Caribbean | Bahamas Marine Mammal Research Organisation                          |                                                                                                                                                                                                                                                                                                                                                                                              | Marine Mammals                                                         | no info                                                                                                                                                                                                                                                    |
| Bahrain | AIS       | Applied Science University                                           | Administrative Sciences, Arts and Sciences, Law                                                                                                                                                                                                                                                                                                                                              |                                                                        | no info                                                                                                                                                                                                                                                    |
| Bahrain | AIS       | Royal College of Surgeons in Ireland - Medical University of Bahrain | Medicine, Nursing and Midwifery, Postgraduate Studies and Research                                                                                                                                                                                                                                                                                                                           |                                                                        | no info                                                                                                                                                                                                                                                    |
| Bahrain | AIS       | University of Bahrain                                                | American Studies, E-Learning, English language, French Studies, German Studies, Japanese Studies, Measurement and Evaluation, Road and Transport Studies, Applied Studies, Arts, Bahrain Teachers College, Business Administration, Engineering,                                                                                                                                             | Biology, Chemistry, Environmental Studies, Biochemistry, Biotechnology | no info                                                                                                                                                                                                                                                    |

|          |           |                                                  |                                                                                                                                                                                                                                                                           |                                                                                                                                                                                                                                                                                                                                                                                                                |                                                             |
|----------|-----------|--------------------------------------------------|---------------------------------------------------------------------------------------------------------------------------------------------------------------------------------------------------------------------------------------------------------------------------|----------------------------------------------------------------------------------------------------------------------------------------------------------------------------------------------------------------------------------------------------------------------------------------------------------------------------------------------------------------------------------------------------------------|-------------------------------------------------------------|
|          |           |                                                  | Health Sciences, Information Technology, Law, Physical Education and Physiotherapy, Science                                                                                                                                                                               |                                                                                                                                                                                                                                                                                                                                                                                                                |                                                             |
| Bahrain  | AIS       | Ahlia University                                 | Arts, Science and Education; Banking and Finance; Engineering; Information Technology; Medical and Health Sciences                                                                                                                                                        |                                                                                                                                                                                                                                                                                                                                                                                                                | no info                                                     |
| Bahrain  | AIS       | AMA International University - Bahrain           | Administrative and Financial Sciences; Computer Sciences; Engineering, Medicine, Education                                                                                                                                                                                |                                                                                                                                                                                                                                                                                                                                                                                                                | no info                                                     |
| Bahrain  | AIS       | Arab Open University - Bahrain Branch            | Business; English, Information Technology, General Studies                                                                                                                                                                                                                |                                                                                                                                                                                                                                                                                                                                                                                                                | no info                                                     |
| Bahrain  | AIS       | Arabian Gulf University                          | Graduate Studies; Medicine and Medical Sciences; Management and Finance, Centre for Modern and Soiless Culture                                                                                                                                                            | Environmental Management, Water Management, Sustainable Agriculture, Water Resources Management, Wastewater                                                                                                                                                                                                                                                                                                    | no info                                                     |
| Bahrain  | AIS       | College of Health Sciences                       | Allied Health; Integrated Sciences, Nursing                                                                                                                                                                                                                               |                                                                                                                                                                                                                                                                                                                                                                                                                | no info                                                     |
| Bahrain  | AIS       | Delmon University for Science and Technology     | Administrative and Financial Sciences; Arts; Fine Arts; Education; Information Technology and Computer Science; Law                                                                                                                                                       |                                                                                                                                                                                                                                                                                                                                                                                                                | no info                                                     |
| Bahrain  | AIS       | Gulf University                                  | Human Resource Management, Interior Design Engineering, Mass Communication, Accounting and Financial Sciences,                                                                                                                                                            |                                                                                                                                                                                                                                                                                                                                                                                                                | no info                                                     |
| Bahrain  | AIS       | Royal University for Women                       | Art and Design; Business and Financial Sciences; Law, Information Technology, Engineering                                                                                                                                                                                 |                                                                                                                                                                                                                                                                                                                                                                                                                | no info                                                     |
| Bahrain  | AIS       | The Kingdom University                           | Law, Business Management, Finance and Banking, Finance and Accounting, Architecture Engineering Interior Design, Law                                                                                                                                                      |                                                                                                                                                                                                                                                                                                                                                                                                                | no info                                                     |
| Bahrain  | AIS       | University College of Bahrain                    | Business Administration; Communication and Media; Information Technology                                                                                                                                                                                                  |                                                                                                                                                                                                                                                                                                                                                                                                                | no info                                                     |
| Barbados | Caribbean | University of the West Indies - Cave Hill Campus | Caribbean Law; Resource Management and Environmental Studies; International Business; Social and Economic Studies; Humanities and Education; Law; Medical Sciences; Pure and Applied Sciences; Social Sciences; Chronic Disease; Gender and Development Studies, Business | Biotechnology (Agriculture, Horticulture), Biodiversity, Natural Products, Natural Hazard Management, Natural Resource and Environmental Use and management, Fisheries, Water Resources, Biochemistry, Biological Sciences, Marine Biota, Biology and Ecology of Coral Reefs, Ecology of a Changing Planet, Biology, Chemistry, Environmental Chemistry and Toxicology, Ecology, Environmental Science,, Water | NMR Spectrometers, GC-MS Spectrometers, LC-MS Spectrometers |

|            |           |                                            |                                                                                                                                                                                                                                               |                                                                                                                                                                                                                                                  |         |
|------------|-----------|--------------------------------------------|-----------------------------------------------------------------------------------------------------------------------------------------------------------------------------------------------------------------------------------------------|--------------------------------------------------------------------------------------------------------------------------------------------------------------------------------------------------------------------------------------------------|---------|
|            |           |                                            |                                                                                                                                                                                                                                               | Quality Coastal management, Biodiversity, Climate Change Sustainable Development, Oceanography, Meteorology                                                                                                                                      |         |
| Belize     | Caribbean | Galen University                           | Arts and Sciences; Business and Entrepreneurship; Education; Science and Technology                                                                                                                                                           | Environmental Science, Oceanography, Chemistry                                                                                                                                                                                                   | no info |
| Belize     | Caribbean | University of Belize                       | Adult and Continuing Education; Education and Arts; Management and Social Sciences; Nursing, Allied Health and Social Work; Science and Technology                                                                                            | Agriculture; Biology; Chemistry; Marine Sciences and Oceanography, Natural Resources, Marine Biology, Natural Resource management                                                                                                                | no info |
| Belize     | Caribbean | University of the West Indies Open Campus  | Law, Computers, English, Management, Counselling, Maritime Collision and Prevention, Shipping and Logistics                                                                                                                                   |                                                                                                                                                                                                                                                  | no info |
| Cape Verde | AIS       | Jean Piaget University of Cape Verde       | Arts and Humanities and Social Sciences; Environmental, Natural and Life Sciences; Exact Sciences, Technology and Engineering; Law, Economics and Political Sciences                                                                          | Biology, Development Studies, Ecology, Environmental Studies, Natural Sciences                                                                                                                                                                   | no info |
| Cape Verde | AIS       | University of Cape Verde                   | Engineering and Marine Sciences; Science and Technology; Social Sciences and Humanities; Agricultural and Environmental Sciences, Business and Government                                                                                     | Biological and Life Sciences, Chemistry, Environmental Studies; Water Science; Environmental Engineering, Fishery, Instrument Making, Laboratory Techniques, Marine Engineering, Marine Science and Oceanography, Marine Transport, Maritime Law | no info |
| Cape Verde | AIS       | Higher Institute of Economics and Business | Accountancy; business Computing; International Business; Management; Marketing; Tourism                                                                                                                                                       |                                                                                                                                                                                                                                                  | no info |
| Cape Verde | AIS       | Institute of Law and Social Sciences       | Political Science and Public Administration; Criminology and Public Security; Economics and Business Administration; International Relations and Diplomacy; Law; Marketing and Public Relations                                               |                                                                                                                                                                                                                                                  | no info |
| Cape Verde | AIS       | Lusophone University of Cape Verde         | Accountancy; Administration and Auditing; Architecture and Town Planning; Business Administration; Communication Sciences; Computer Engineering; Design; Law; Modern Languages; Psychology; Security Management; Tourism and Hotel Management |                                                                                                                                                                                                                                                  | no info |

|            |           |                                                                     |                                                                                                                                                                                  |                                                                                             |         |
|------------|-----------|---------------------------------------------------------------------|----------------------------------------------------------------------------------------------------------------------------------------------------------------------------------|---------------------------------------------------------------------------------------------|---------|
| Cape Verde | AIS       | University Institute of Art, Technology and Culture                 | Architecture; Communication Design; Cultural Management and Production; Design; Sound and Images; Visual Arts                                                                    |                                                                                             | no info |
| Cape Verde | AIS       | University of Mindelo                                               | Arts and Humanities, Law and Social Sciences; Economics and Management; Engineering and Marine Resources; Health Sciences                                                        | Marine Science and Oceanography; Natural Sciences                                           | no info |
| Cape Verde | AIS       | University of Santiago                                              | Economics and Management; Educational Sciences, Philosophy, and Modern Languages; Health and Environmental Sciences and Technology; Law and Social Sciences                      | Biological and Life Sciences, Environmental Management                                      | no info |
| Comoros    | AIS       | University of the Comoros                                           | Arts and Humanities; Imam Shafioun; Law and Economics; Teachers Training and Education Research; Technology; Medicine and Public Health                                          |                                                                                             | no info |
| Comoros    | AIS       | Kampala University                                                  | Arts and Social Sciences, Business and Management, Computer Science and IT, Education, Industrial Art and Design, Graduate School, Natural Sciences, Nursing and Health Sciences | Environmental Science and Management, Agriculture, Biology, Physics, Mathematics, Chemistry | no info |
| Cuba       | Caribbean | Camilo Cienfuegos University of Matanzas                            | Agronomy; Economics and Computer Science; Education; Engineering; Physical Education; Social Sciences and Humanities, Chemistry and Mechanics                                    | Biology; Chemistry                                                                          | no info |
| Cuba       | Caribbean | Carlos J. Finlay University of Medical Sciences of Camaguey         | Medical Sciences; Stomatology                                                                                                                                                    |                                                                                             | no info |
| Cuba       | Caribbean | Dr. Antonio Núñez Jiménez Institute of Mining and Metallurgy of Moa | Geology and Mining; Humanities; Metallurgy and Electro mechanics                                                                                                                 | Geology                                                                                     | no info |
| Cuba       | Caribbean | Enrique José Varona Pedagogical University                          | Educational Sciences; Foreign Languages; Humanities; Primary Education; Science                                                                                                  | Biology; Chemistry; Natural Sciences                                                        | no info |
| Cuba       | Caribbean | Félix Varela Morales Pedagogical University of Villa Clara          | Biology; Educational Sciences; Environmental Sciences; Foreign Languages; Humanities; Primary Education; Technical Sciences                                                      | Environmental Studies; Biology, Natural Sciences                                            | no info |
| Cuba       | Caribbean | Frank País García Pedagogical University                            | Education; Educational Sciences; Humanities; Science; Technical Sciences                                                                                                         | Natural Sciences                                                                            | no info |
| Cuba       | Caribbean | Fructuoso Rodríguez Pérez Agrarian University of Havana             | Agricultural Engineering; Agriculture; Computer Science; Economics; Pedagogical Science; Physical Education; Social Sciences and Humanities, Veterinary Science                  | Biology; Chemistry                                                                          | no info |
| Cuba       | Caribbean | Guantánamo University                                               | Agro-Forestry; Economics and Business Administration; Law; Social Sciences and Humanities, Informatics Engineering                                                               |                                                                                             | no info |
| Cuba       | Caribbean | Ignacio Agramonte Loynaz University of Camagüey                     | Agriculture; Construction Engineering; Economics; Electro mechanics; Humanity; Law and Economics;                                                                                | Chemistry; Biology; Geography; Natural Sciences                                             | no info |



|      |           |                                                         |                                                                                                                                                                                                                                                                                                                                                                                                                                                                                                                                                                                                                                                                                                                                                                       |                                                                                             |         |
|------|-----------|---------------------------------------------------------|-----------------------------------------------------------------------------------------------------------------------------------------------------------------------------------------------------------------------------------------------------------------------------------------------------------------------------------------------------------------------------------------------------------------------------------------------------------------------------------------------------------------------------------------------------------------------------------------------------------------------------------------------------------------------------------------------------------------------------------------------------------------------|---------------------------------------------------------------------------------------------|---------|
|      |           |                                                         | Physical Education; Primary Education; Science Applied to Industry; Teachers Training, Social Science, Communication and Languages, Pedagogical Sciences, Computer Science,                                                                                                                                                                                                                                                                                                                                                                                                                                                                                                                                                                                           |                                                                                             |         |
| Cuba | Caribbean | Jesús Montané Oropesa University of Isla de la Juventud | Education; Physical Education; Social Sciences and Humanities; Technical Sciences                                                                                                                                                                                                                                                                                                                                                                                                                                                                                                                                                                                                                                                                                     | Biology; Chemistry                                                                          | no info |
| Cuba | Caribbean | José Antonio Echeverría Polytechnic Institute           | Architecture; Chemical Engineering; Civil Engineering; Computer Engineering; Electrical Engineering; Industrial Engineering; Mechanical Engineering, Telecommunication Engineering, Automation and Biomedical Engineering                                                                                                                                                                                                                                                                                                                                                                                                                                                                                                                                             |                                                                                             | no info |
| Cuba | Caribbean | José de la Luz y Caballero Pedagogical University       | Educational Sciences; Humanities; Primary Education; Science; Technical Sciences                                                                                                                                                                                                                                                                                                                                                                                                                                                                                                                                                                                                                                                                                      | Biology; Chemistry, Natural Sciences                                                        | no info |
| Cuba | Caribbean | José Martí Pérez University of Sancti Spiritus          | Accountancy and Finance; Engineering; Humanities; Agriculture                                                                                                                                                                                                                                                                                                                                                                                                                                                                                                                                                                                                                                                                                                         |                                                                                             | no info |
| Cuba | Caribbean | Las Tunas University Vladimir Ilich Lenin               | Agricultural Sciences; Basic Education; Economics; Physical Education; Secondary Education; Social Sciences and Humanities; Technology                                                                                                                                                                                                                                                                                                                                                                                                                                                                                                                                                                                                                                |                                                                                             | no info |
| Cuba | Caribbean | Latin American School of Medicine                       | Dentistry; Medicine; Nursing                                                                                                                                                                                                                                                                                                                                                                                                                                                                                                                                                                                                                                                                                                                                          |                                                                                             | no info |
| Cuba | Caribbean | Manuel Ascunce Domenech Pedagogical University          | Humanities; Pre-School Teacher Training; Sciences; Secondary Teacher Training; Technical Sciences                                                                                                                                                                                                                                                                                                                                                                                                                                                                                                                                                                                                                                                                     | Natural Sciences                                                                            | no info |
| Cuba | Caribbean | Marta Abreu Central University of Las Villas            | Agricultural Research; Agriculture; Applied Chemistry Studies; Bioactive Chemistry; Botanical Garden Studies; Business Administration; Chemistry and Pharmacy; Community Studies; Computational Mechanics and Numerical Methods in Engineering; Construction Engineering; Educational Sciences; Electrical Energy Studies; Electrical Engineering; Energy and Environmental Technologies; Humanities; Industrial and Mechanical Engineering; Informatics Studies; Information Science and Education; Information Technology and Electronic Studies; Law; Mathematics, Physics and Computer Science; Mechanical Engineering; Physical Education and Sport; Plant Biotechnology; Research and Development of Structures and Materials; Social Sciences; Welding Studies | Applied Chemistry; Chemistry; Botany; Biochemistry; Biology; Ecology; Environmental Studies | no info |
| Cuba | Caribbean | Medical University Dr. Juan Guiteras Gener of Matanzas  | Medicine                                                                                                                                                                                                                                                                                                                                                                                                                                                                                                                                                                                                                                                                                                                                                              |                                                                                             | no info |

|      |           |                                                                      |                                                                                                                                                                                                                   |                                                                           |         |
|------|-----------|----------------------------------------------------------------------|-------------------------------------------------------------------------------------------------------------------------------------------------------------------------------------------------------------------|---------------------------------------------------------------------------|---------|
| Cuba | Caribbean | National Centre for Agricultural Health                              | Animal Health and Production; Biopharmaceutical Productions; Engineering and Services; Human Resources Management; Microbiology; Plant Protection; Quality Assurance; Technological Innovation, Agronomy, Biology | Agriculture                                                               | no info |
| Cuba | Caribbean | National Coordination Centre for Clinical Trials                     | Clinical Science                                                                                                                                                                                                  |                                                                           | no info |
| Cuba | Caribbean | National Institute of Agricultural Sciences                          | Applied Mathematics; Genetics; Nutrition; Physiology and Vegetal Biochemistry; Pyrotechnics, Agriculture                                                                                                          | Agriculture                                                               | no info |
| Cuba | Caribbean | National Institute of Health Workers                                 | Health Sciences; Physiology; Psychology                                                                                                                                                                           |                                                                           | no info |
| Cuba | Caribbean | National Institute of Hygiene, Epidemiology and Microbiology         | Biochemistry and Physiology; Epidemiology; Food Science; Hygiene; Microbiology; Nutrition; Public Health                                                                                                          |                                                                           | no info |
| Cuba | Caribbean | Pedagogical University Hector Pineda Alfredo Zaldivar                | Computer Science and General Studies; Mechanical Engineering, Electrical Engineering, Accounting, Agricultural Engineering, Civil Engineering                                                                     |                                                                           | no info |
| Cuba | Caribbean | Pedro Kourí Tropical Medicine Institute                              | Tropical Medicine                                                                                                                                                                                                 |                                                                           | no info |
| Cuba | Caribbean | Institute of Neurology and Neurosurgery                              | Neurology                                                                                                                                                                                                         |                                                                           | no info |
| Cuba | Caribbean | Rafael María de Mendive Pedagogical University of Pinar del Río      | Education; Humanities; Science                                                                                                                                                                                    | no info                                                                   | no info |
| Cuba | Caribbean | Raul Roa García Higher Institute of International Relations          | International Relations                                                                                                                                                                                           |                                                                           | no info |
| Cuba | Caribbean | Serafín Ruiz de Zárate University of Medical Sciences of Villa Clara | Health Technology; Medical Sciences; Nursing; Stomatology                                                                                                                                                         | no info                                                                   | no info |
| Cuba | Caribbean | University of Arts                                                   | Audio-visual Media Communications; Dance; Music; Plastic Arts; Theatre                                                                                                                                            |                                                                           | no info |
| Cuba | Caribbean | University of Ciego de Avila                                         | Engineering, Economics, Informatics, Agriculture, Social Sciences and Humanities                                                                                                                                  | Agriculture                                                               | no info |
| Cuba | Caribbean | University of Matanzas                                               | Agriculture, Social Sciences and Humanities, Physical Education, Engineering and Economics, Informatics, Chemistry and Mechanics                                                                                  | Agriculture, Chemistry                                                    | no info |
| Cuba | Caribbean | University of Technology de la Habana                                | Architecture, Engineering, Biomedicine, Telecommunications                                                                                                                                                        | Chemistry                                                                 | no info |
| Cuba | Caribbean | University of Cienfuegos                                             | Economics and Business; Engineering; Humanities; Education; Physical Education; Social Sciences; Agriculture,                                                                                                     | Environmental Management; Environmental Studies; Sustainable Agriculture, | no info |

|          |           |                                                            |                                                                                                                                                                                                                                                                                                  |                                                                                                                                                        |                                                                                                                                                            |
|----------|-----------|------------------------------------------------------------|--------------------------------------------------------------------------------------------------------------------------------------------------------------------------------------------------------------------------------------------------------------------------------------------------|--------------------------------------------------------------------------------------------------------------------------------------------------------|------------------------------------------------------------------------------------------------------------------------------------------------------------|
|          |           |                                                            |                                                                                                                                                                                                                                                                                                  | Management of Coastal Areas,<br>Biology, Geography, Water<br>Management, Oceanography,                                                                 |                                                                                                                                                            |
| Cuba     | Caribbean | University of Computer Science                             | Computer Science                                                                                                                                                                                                                                                                                 |                                                                                                                                                        | no info                                                                                                                                                    |
| Cuba     | Caribbean | University of Granma                                       | Environmental Management, Biochemistry,<br>Agriculture, Nutrition, Accounting,                                                                                                                                                                                                                   | Chemistry; Development Studies;<br>Biology, Agriculture, Biochemistry                                                                                  | no info                                                                                                                                                    |
| Cuba     | Caribbean | University of Havana                                       | Accountancy and Economics, Natural Sciences,<br>Social Sciences and Humanities, Arts,<br>Communication, Law, Finance, Tourism                                                                                                                                                                    | Biology, Geography, Nuclear<br>Science, Chemistry, Zoology,<br>Biodiversity, Environmental<br>Management, Marine Science,<br>Conservation, Corel Reefs | X-ray fluorescence, Total reflection X-ray<br>fluorescence, Neutron Activation<br>Analysis, Neutron generators and<br>nuclear reactors, gamma spectrometry |
| Cuba     | Caribbean | University of Holguín                                      | Agriculture, Natural Sciences, Education,<br>Mathematics and Computer Science; Physical<br>Education; Communication, Social Sciences,<br>Business and Administration, Engineering, Tourism,<br>Environmental Management,                                                                         | Chemistry, Biology, Agriculture,                                                                                                                       | no info                                                                                                                                                    |
| Cuba     | Caribbean | University of Medical Sciences of<br>Guantanamo            | Medicine                                                                                                                                                                                                                                                                                         |                                                                                                                                                        | no info                                                                                                                                                    |
| Cuba     | Caribbean | University of Medical Sciences of<br>Pinar del Rio         | Medicine                                                                                                                                                                                                                                                                                         |                                                                                                                                                        | no info                                                                                                                                                    |
| Cuba     | Caribbean | University of Medical Sciences of<br>Sancti Spiritu        | Medicine                                                                                                                                                                                                                                                                                         |                                                                                                                                                        | no info                                                                                                                                                    |
| Cuba     | Caribbean | University of Oriente                                      | Mechanical and Industrial Engineering, Economics<br>and Business, Electrical Engineering, Humanities,<br>Natural Sciences, Social Sciences, Construction,<br>Sports, Law, Foreign Languages, Biomedicine,<br>Telecommunications, Informatics, Education,<br>Agriculture and Chemical Engineering | Coastal Zone Management;<br>Biology; Chemistry; Geography                                                                                              | no info                                                                                                                                                    |
| Cuba     | Caribbean | University of Pinar del Río<br>Hermanos Saiz Montes de Oca | Technology, Forestry and Agriculture, Economics<br>and Business, Social Science and Humanities,<br>Education, Media, Sports                                                                                                                                                                      | Agriculture, Biology, Chemistry                                                                                                                        | no info                                                                                                                                                    |
| Dominica | Caribbean | Dominica State College                                     | Business and Management                                                                                                                                                                                                                                                                          |                                                                                                                                                        | no info                                                                                                                                                    |
| Dominica | Caribbean | Institute of Tropical Marine<br>Ecology Inc.               | Marine Science                                                                                                                                                                                                                                                                                   | Marine science, Coastal Benthic<br>Environment, Marine Ecology,<br>Conservation, Marine resources                                                      | no info                                                                                                                                                    |
| Dominica | Caribbean | Ross University School of<br>Medicine in Dominica          | Health Science and Medicine,                                                                                                                                                                                                                                                                     |                                                                                                                                                        | no info                                                                                                                                                    |
| Dominica | Caribbean | New World University                                       | Economics and Public Policy, Education,<br>Information System, Journalism, Professional<br>Studies                                                                                                                                                                                               |                                                                                                                                                        | no info                                                                                                                                                    |

|                    |           |                                               |                                                                                                                                                                                                                                                                                                |                                                                                                                                                |         |
|--------------------|-----------|-----------------------------------------------|------------------------------------------------------------------------------------------------------------------------------------------------------------------------------------------------------------------------------------------------------------------------------------------------|------------------------------------------------------------------------------------------------------------------------------------------------|---------|
| Dominica           | Caribbean | International University of Graduate Studies  | Addiction Studies, Arts, Humanities, Natural Sciences, Mathematics and Statistics, Behavioral Health, Education, Library Science, Management and Economics, Therapy, Public Health, Social Science, Political Science, Philosophy, Social Science                                              | Biology; Biochemistry; Environmental Sciences; Natural Environments and Wildlife; Chemistry; Earth Sciences                                    | no info |
| Dominica           | Caribbean | University of the West Indies Open Campus     | Business and Management, Social Sciences, Education, Languages, Mathematics, Accounting, Banking and finance, Economics and Management, Political Science, Psychology, Sociology, Sports, Criminology, Climate Change, Human Resource management, Tourism and Hospitality, Health and Wellness | Climate Change, Conservation                                                                                                                   | no info |
| Dominican Republic | Caribbean | Nordestana Catholic University                | Economics and Social Sciences; Engineering; Health Sciences; Law, Sciences                                                                                                                                                                                                                     | Biology                                                                                                                                        | no info |
| Dominican Republic | Caribbean | APEC University                               | Accountancy; Finance, Marketing, Administration; Arts; Computer Science; Engineering and Technology; Economics, Languages; Law; Communication, Mathematics, Tourism                                                                                                                            |                                                                                                                                                | no info |
| Dominican Republic | Caribbean | Autonomous University of Santo Domingo        | Agronomy and Veterinary Science; Arts; Economics and Social Sciences; Engineering and Architecture; Health Sciences; Humanities; Law and Political Science; Science, Education                                                                                                                 | Biology; Chemistry; Geography, Marine Biology, Zoology, Biodiversity, Coastal Zones, Climate Change, Water Management, Environmental Chemistry | no info |
| Dominican Republic | Caribbean | Barna Management School                       | Business Administration                                                                                                                                                                                                                                                                        |                                                                                                                                                | no info |
| Dominican Republic | Caribbean | Catholic Technological University of Barahona | Business Studies; Computer Science; Education; Law; Nursing, Information Science, Psychology                                                                                                                                                                                                   |                                                                                                                                                | no info |
| Dominican Republic | Caribbean | Catholic University of Santo Domingo          | Economics and Administration; Health Sciences; Humanities and Education; Law and Political Science; Religious Sciences; Science and Technology; Social Sciences and Communication, Architecture and Fine Arts                                                                                  | no info                                                                                                                                        | no info |
| Dominican Republic | Caribbean | Central University of the East                | Business Administration, Tourism, Architecture, Bioanalysis, Accounting, Law, Nursing, Languages and Literature, Mathematics, Education, Chemistry, Biology, Dentistry, Pharmacy, Engineering, Medicine, Veterinary, Marketing, Psychology, Human Resources, Finance,                          | Biology, Chemistry, Biochemistry, Environmental Chemistry, Zoology, Ecology, Natural Resources                                                 | no info |
| Dominican Republic | Caribbean | Dominican Adventist University                | Administration; Engineering and Technology; Health Sciences; Management; Theology, Education,                                                                                                                                                                                                  | Biology, Chemistry, Zoology, Biochemistry                                                                                                      | no info |

|                    |           |                                                                                              |                                                                                                                                                                      |                                                           |         |
|--------------------|-----------|----------------------------------------------------------------------------------------------|----------------------------------------------------------------------------------------------------------------------------------------------------------------------|-----------------------------------------------------------|---------|
| Dominican Republic | Caribbean | Dominican O&M University                                                                     | Tourism and Hospitality, Architecture, Communication Science, Marketing, Law, Education, Engineering, Psychology, Accounting, Medicine, Music                        |                                                           | no info |
| Dominican Republic | Caribbean | Dominican University of Industrial Psychology                                                | Psychology, Interior Design, Marketing                                                                                                                               |                                                           | no info |
| Dominican Republic | Caribbean | Dominican-American University                                                                | Business Administration; Education; Engineering; Tourism and Hotel Management, English, Teaching, Software Engineering, System informatics, Finance                  |                                                           | no info |
| Dominican Republic | Caribbean | Dr. Eduardo Latorre Rodríguez Higher Education Institute in Diplomatic and Consular Training | Diplomacy and Consular Services                                                                                                                                      |                                                           | no info |
| Dominican Republic | Caribbean | Eugenio María de Hostos University                                                           | Accounting, Nursing, Medicine, Dentistry, Marketing, Business, Communication Science, Law                                                                            |                                                           | no info |
| Dominican Republic | Caribbean | Federico Henríquez y Carvajal University                                                     | Accountancy, Business Administration, Tourism, Marketing, Computer Science; Dentistry; Education; Engineering; Nursing, Agriculture, Information Science, Psychology | no info                                                   | no info |
| Dominican Republic | Caribbean | Felix Adam Experimental University                                                           | Business Administration; Law; Marketing, Social Sciences and Humanities                                                                                              |                                                           | no info |
| Dominican Republic | Caribbean | Fernando Arturo de Meriño University of Agriculture and Forestry                             | Agronomy and Forestry, Education, Information Science, Accounting, Tourism                                                                                           | Agriculture, Biology, Geography, Chemistry, Zoology       | no info |
| Dominican Republic | Caribbean | Global Institute of Advanced Studies in Social Sciences                                      | Law, Business, Social Sciences and Humanities, Education, Political Science for Democratic Development, Film and Communication                                       |                                                           | no info |
| Dominican Republic | Caribbean | Ibero-American University                                                                    | Arts, Business Administration; Engineering; Education; Law; Marketing; Medicine                                                                                      |                                                           | no info |
| Dominican Republic | Caribbean | Interamerican University                                                                     | Law and Political Science; Science and Technology; Social Sciences and Humanities                                                                                    | no info                                                   | no info |
| Dominican Republic | Caribbean | ISA University                                                                               | Agriculture, Food Technology and Environment; Social Sciences and Administration                                                                                     | Environmental Management; Ecology                         | no info |
| Dominican Republic | Caribbean | National Evangelical University, Santiago                                                    | Business Studies; Education; Health Sciences; Psychology; Theology; Nutrition, Law, Nursing, Accounting, Administration, Computer Science, Psychology,               | Chemistry, Biology, Environmental Chemistry, Biochemistry | no info |
| Dominican Republic | Caribbean | National Technological University                                                            | Business Administration; Technology, Engineering and Architecture, Finance, Operations Management, Marketing                                                         |                                                           | no info |

|                    |           |                                                                                |                                                                                                                                                                                                             |                                                                    |         |
|--------------------|-----------|--------------------------------------------------------------------------------|-------------------------------------------------------------------------------------------------------------------------------------------------------------------------------------------------------------|--------------------------------------------------------------------|---------|
| Dominican Republic | Caribbean | National University-Institute of Exact Sciences                                | Economics and Social Sciences; Engineering, Architecture and Technology; Law and Political Science; Lifelong Education                                                                                      | no info                                                            | no info |
| Dominican Republic | Caribbean | Open University for Adults                                                     | Business; Education; Engineering and Technology; Languages; Law and Political Science; Psychology; Tourism                                                                                                  |                                                                    | no info |
| Dominican Republic | Caribbean | Pedro Henríquez Ureña National University                                      | Agriculture and Veterinary Science; Architecture and Arts; Biomedical Sciences; Economics and Social Sciences; Health Sciences; Humanities and Education; Law and Political Science; Science and Technology | Biochemistry, Biology, Agriculture                                 | no info |
| Dominican Republic | Caribbean | Pontifical Catholic University Madre y Maestra                                 | Engineering; Health Sciences; Humanities and Social Sciences; Arts, Economics and Administration                                                                                                            |                                                                    | no info |
| Dominican Republic | Caribbean | Salomé Ureña Teacher Training Institute                                        | Education                                                                                                                                                                                                   |                                                                    | no info |
| Dominican Republic | Caribbean | Specialized Institute in Research and Training in Legal Sciences OMG Institute | Legal Strategies; Public Economic Law                                                                                                                                                                       |                                                                    | no info |
| Dominican Republic | Caribbean | Technological Institute of Eastern Cibao                                       | Engineering and Natural Resources; Humanities                                                                                                                                                               | Natural Resources; Zoology, Agriculture                            | no info |
| Dominican Republic | Caribbean | Technological Institute of Santo Domingo                                       | Basic and Environmental Sciences; Business Administration; Engineering; Health Sciences; Social Sciences and Humanities                                                                                     | Development Studies; Environmental Studies, Biology,               | no info |
| Dominican Republic | Caribbean | Technological University of Santiago                                           | Agriculture, Animal Husbandry and Development; Architecture and Engineering; Economics and Social Sciences; Health Sciences; Meat Processing and Development; Science and Humanities; Secretarial Studies   | Biochemistry; Zoology; Development Studies, Agriculture,           | no info |
| Dominican Republic | Caribbean | Technological University of the Cibao                                          | Humanities; Science and Technology, Marketing, Engineering, Medicine                                                                                                                                        | Agriculture, Natural Resources, Zoology, Biology, Natural Sciences | no info |
| Dominican Republic | Caribbean | Technological University of the South                                          | Accountancy; Agronomy; Bioanalysis; Business Administration; Computer Science; Education; Law; Marketing; Nursing                                                                                           | no info                                                            | no info |
| Dominican Republic | Caribbean | University of the Caribbean                                                    | Law, Business, Humanities, Political Science, Technology                                                                                                                                                    |                                                                    | no info |
| Dominican Republic | Caribbean | University of the Third Age                                                    | Economics and Administration; Health Sciences; Humanities; Law and Political Science, Accounting, Marketing                                                                                                 |                                                                    | no info |
| Dominican Republic | Caribbean | Instituto Superior de Tecnologia Universal                                     | Education, Marketing, Business, technology                                                                                                                                                                  |                                                                    | no info |

|                                |           |                                          |                                                                                                                                                                              |                                                                                                                                                                                                                                          |         |
|--------------------------------|-----------|------------------------------------------|------------------------------------------------------------------------------------------------------------------------------------------------------------------------------|------------------------------------------------------------------------------------------------------------------------------------------------------------------------------------------------------------------------------------------|---------|
| Dominican Republic             | Caribbean | Insituto Politecnico Loyola              | Education, Management                                                                                                                                                        |                                                                                                                                                                                                                                          | no info |
| Dominican Republic             | Caribbean | Institute of Technology Las Americas     | Multimedia, Software, Manufacturing, Security, Sound, Networking, Medical Services, Mechatronic                                                                              |                                                                                                                                                                                                                                          | no info |
| Dominican Republic             | Caribbean | Instituto Técnico Superior Mercy Jácquez | Fashion                                                                                                                                                                      |                                                                                                                                                                                                                                          | no info |
| Federated States of Micronesia | Pacific   | College of Micronesia                    | Business and Administration; Language and Literature, Social Science, Math and Natural Sciences                                                                              | Agriculture, Fishery, Aquaculture, Marine Biology, Oceanography, Chemistry, Zoology, Environmental Studies, Water Quality                                                                                                                | no info |
| Fiji                           | Pacific   | University of the South Pacific          | Arts, Law, and Education; Business and Economics; Science, Technology, and Environment; The Pacific Eye Institute                                                            | Biology, Chemistry, Earth Sciences, Environmental Management, Environmental Studies, Geography, Marine Science and Oceanography                                                                                                          | no info |
| Fiji                           | Pacific   | Fiji National University                 | Agriculture, Fisheries and Forestry; Business, Hospitality and Tourism; Engineering, Science and Technology; Humanities and Education; Medicine, Nursing and Health Sciences | Fishery, Biology, Chemistry, Environmental Studies, Marine Science and Oceanography, Geography, Aquaculture, Agriculture, Water Quality, Climate Change                                                                                  | no info |
| Fiji                           | Pacific   | The University of Fiji                   | Business and Economics, Humanities and Arts, Law, Medicine, Science and Technology, Foundation Studies,                                                                      | Environmental Management, Environmental Studies, Biology, Chemistry, Climate Change, Sustainable Development, Marine Biology, Biodiversity, Conservation, Aquatic Chemistry, Biochemistry, Geology, Ecology, Natural Resource Management | no info |
| Grenada                        | Caribbean | St George's University                   | Medicine; Veterinary Science, Graduate Studies, Arts and Sciences                                                                                                            | Biochemistry, Biology, Chemistry, Conservation and Environmental Science, Natural Resources, Zoology, Wildlife, Oceanography, Ecology, Marine Science,                                                                                   | no info |
| Guinea-Bissau                  | AIS       | Colinas University of Boé                | Accountancy and Management; Computer Engineering, Law; Public Administration and Social Economy; Social Communication and Marketing                                          | no info                                                                                                                                                                                                                                  | no info |
| Guinea-Bissau                  | AIS       | Jean Piaget University of Guinea-Bissau  | Economics and Business; Health Sciences; Political Sciences and Education; Sciences and Technologies                                                                         | Geology                                                                                                                                                                                                                                  | no info |

|               |           |                                                   |                                                                                                                                                                                                                                                                                                                                                                                                                                                                                                                            |                                                                                                                                                                                                                                       |         |
|---------------|-----------|---------------------------------------------------|----------------------------------------------------------------------------------------------------------------------------------------------------------------------------------------------------------------------------------------------------------------------------------------------------------------------------------------------------------------------------------------------------------------------------------------------------------------------------------------------------------------------------|---------------------------------------------------------------------------------------------------------------------------------------------------------------------------------------------------------------------------------------|---------|
| Guinea-Bissau | AIS       | Lusophone University of Guinea                    | Business Administration and Management; Computer Engineering; Economics; Educational Sciences, Human Resource Management; Law; Marine and Environmental Sciences; Nursing; Organizational Communication and Journalism; Political Science and International Relations; Social Work; Sociology, Arts and Design, Film and Media Arts, Humanities, Religion Studies, Psychology, Sports, Tourism, Aeronautics, Architecture and Planning, Health Science, Veterinary                                                         | Marine Biology, Biology, Chemistry, Zoology, Ecology, Biochemistry, Ecotoxicology, Water Pollution                                                                                                                                    | no info |
| Guyana        | Caribbean | American University of Peace Studies              | Human Resource Management; Peace and Conflict Studies; Professional Counselling; Psychology; Public Communication; Strategic Project Management                                                                                                                                                                                                                                                                                                                                                                            |                                                                                                                                                                                                                                       | no info |
| Guyana        | Caribbean | Rajiv Gandhi University of Science and Technology | Arts and Sciences; Management Studies; Medicine; Nursing; Pharmacy                                                                                                                                                                                                                                                                                                                                                                                                                                                         |                                                                                                                                                                                                                                       | no info |
| Guyana        | Caribbean | Texila American University                        | Medicine; Nursing; Alternative Medicine; Behavioral Science; Clinical Research; Education; Information Technology; Management; Public Health                                                                                                                                                                                                                                                                                                                                                                               |                                                                                                                                                                                                                                       | no info |
| Guyana        | Caribbean | Georgetown American University                    | Medicine, Allied Health Science, Technology                                                                                                                                                                                                                                                                                                                                                                                                                                                                                |                                                                                                                                                                                                                                       | no info |
| Guyana        | Caribbean | American International School of Medicine         | Pre-med, Basic Sciences, Clinical Sciences                                                                                                                                                                                                                                                                                                                                                                                                                                                                                 |                                                                                                                                                                                                                                       | no info |
| Guyana        | Caribbean | University of Guyana                              | Agriculture and Forestry; Health Sciences; Social Sciences, Technology; Distance and Continuing Education; American Studies; Earth and Environmental Studies; Education and Humanities, Communication, Accountancy and Finance, Business and Management, Architecture, Biology, Chemistry, Civil Engineering, Computer Science, Economics, Electrical Engineering, Law, Geography, Language and Cultural Studies, Marketing and Tourism, Physics, Statistics, Mathematics, Petroleum and Geological Engineering, Pharmacy, | Biology, Chemistry, Environmental Studies, Geography, Zoology, Fishery, Biochemistry, Ecology, Marine Biology, Climate Change, Disaster Management, Natural Resource management, Conservation and Management, Coastal Zone Management | no info |
| Haiti         | Caribbean | Caribbean University                              | Agriculture; Computer Science; Education; Engineering; Management and Accounting, Humanities                                                                                                                                                                                                                                                                                                                                                                                                                               |                                                                                                                                                                                                                                       | no info |
| Haiti         | Caribbean | Université Queensland                             | Agriculture and Environmental Science, Allied Health Sciences, Arts, Dental Sciences, Engineering, Management, Medicine and Health Community, Nursing, Science and Engineering Civil and Architecture, Veterinary Medicine and Animal                                                                                                                                                                                                                                                                                      | Environmental Science, Nuclear and Atomic Sciences                                                                                                                                                                                    | no info |



|       |           |                                                         |                                                                                                                                                                                                                                                                                                                                                             |                                                                                                                     |         |
|-------|-----------|---------------------------------------------------------|-------------------------------------------------------------------------------------------------------------------------------------------------------------------------------------------------------------------------------------------------------------------------------------------------------------------------------------------------------------|---------------------------------------------------------------------------------------------------------------------|---------|
|       |           |                                                         | Science, Science, Humanities and Social Sciences, Nutrition and Food Science, Nuclear and Atomic Sciences                                                                                                                                                                                                                                                   |                                                                                                                     |         |
| Haiti | Caribbean | Haiti Higher School of Infotronics                      | Business Administration; Computer Engineering, Vocational Training in Information Technology                                                                                                                                                                                                                                                                |                                                                                                                     | no info |
| Haiti | Caribbean | Public University of the Southeast in Jacmel            | Agronomy; Education; Management and Economics                                                                                                                                                                                                                                                                                                               | Biology, Chemistry, Geology, Agriculture, Zoology, Environmental Science, Biochemistry, Natural Resources, Ecology, | no info |
| Haiti | Caribbean | Quisqueya University                                    | Agriculture and Environmental Sciences; Economics and Administration; Educational Science; Health; Law and Political Science; Engineering and Architecture                                                                                                                                                                                                  | Environmental Studies; Biology; Chemistry; Geography, Water Quality                                                 | no info |
| Haiti | Caribbean | State University of Haïti                               | Technical Studies, Planning, Applied Economics; Agronomy and Veterinary Science; Applied Linguistics; Dentistry; Ethnology; Humanities; Law and Economics; Medicine and Pharmacy; Science; Administration, Management and International Studies; African Research Studies; Arts; Law; Law, Economics and Management; Teacher Training, Science, Agriculture | Natural Sciences; Surveying and Mapping, Natural and Environmental Resources, Chemistry, Geography                  | no info |
| Haiti | Caribbean | University Notre-Dame of Haiti                          | Teacher Training; Administration; Administration; Agronomy; Medicine and Health; Nursing, Social and political Science, Agriculture, Environmental Science                                                                                                                                                                                                  | Agriculture, Environmental Science                                                                                  | no info |
| Haiti | Caribbean | Adventist University of Haiti                           | Administration; Educational Sciences; Nursing; Theology, English, Information Science,                                                                                                                                                                                                                                                                      | Biology; Chemistry                                                                                                  | no info |
| Haiti | Caribbean | Christian University of the North                       | English; Administration; Agronomy; Fine Arts; Theology                                                                                                                                                                                                                                                                                                      |                                                                                                                     | no info |
| Haiti | Caribbean | Episcopal University of Haiti                           | Administration; Agronomy; Communication and Public Relations; Computer Science; Educational Science; Medicine; Nursing; Rehabilitation Sciences; Religious Studies, Information Science,                                                                                                                                                                    | Biology, Chemistry, Geology, Zoology, Agriculture, Biochemistry, Water and Climate, Aquaculture, Natural Resources, | no info |
| Haiti | Caribbean | Institute of Advanced Studies in Business and Economics | Accountancy; Economics; Management                                                                                                                                                                                                                                                                                                                          |                                                                                                                     | no info |
| Haiti | Caribbean | INUKA University                                        | Administration and Economics; Engineering and New Technologies; Religious Studies, Educational Sciences and Psychology                                                                                                                                                                                                                                      |                                                                                                                     | no info |
| Haiti | Caribbean | Jean-Price Mars University                              | Accountancy; Business Administration; Civil Engineering; Law; Nursing                                                                                                                                                                                                                                                                                       |                                                                                                                     | no info |

|         |           |                                               |                                                                                                                                                                                                                                                                                                                                                                                                                                                          |                                                                                                                                                      |         |
|---------|-----------|-----------------------------------------------|----------------------------------------------------------------------------------------------------------------------------------------------------------------------------------------------------------------------------------------------------------------------------------------------------------------------------------------------------------------------------------------------------------------------------------------------------------|------------------------------------------------------------------------------------------------------------------------------------------------------|---------|
| Haiti   | Caribbean | Université Lumière                            | Architecture, Law, Civil Engineering and Electronics, Management, Medicine, Education, Nursing, Theology                                                                                                                                                                                                                                                                                                                                                 |                                                                                                                                                      | no info |
| Haiti   | Caribbean | Public University of the Artibonite           | Accountancy; Educational Sciences; Management; Nursing                                                                                                                                                                                                                                                                                                                                                                                                   |                                                                                                                                                      | no info |
| Haiti   | Caribbean | Université Atlantique d'Haiti                 | Education, Information Science, Administration, Nursing, Agriculture, Communication                                                                                                                                                                                                                                                                                                                                                                      | Agriculture                                                                                                                                          | no info |
| Haiti   | Caribbean | University G.O.C                              | Architecture, Design, Law, Management, Electro mechanics, Engineering, Philosophy, Politics, Psychology, Social Science, Animal Science, Anthropology, Consumer Science, Theology, Biochemistry, Biology, Chemical Engineering, Chemistry, Economics, Information Science, Finance, Geology, Geography, Mathematics, Material Science, Music, Plant Science, Physical Education, Physics, Food and Nutrition Science and Forestry Sociology, Agriculture | Agriculture, Biochemistry, Biology Chemistry, Geology, Geography, Conservation, Environmental Science Marine and Freshwater Ecology, Water Chemistry | no info |
| Haiti   | Caribbean | University de Port-au-Prince                  | Information Science, Economy, Humanities, Administration, Law, Political Sciences                                                                                                                                                                                                                                                                                                                                                                        |                                                                                                                                                      | no info |
| Haiti   | Caribbean | University of King Henri Christophe           | Administration; Agriculture and Ecology; Computer Science; Nursing, Communication, Biomedicine, Education, Civil Engineering,                                                                                                                                                                                                                                                                                                                            | Agriculture                                                                                                                                          | no info |
| Jamaica | Caribbean | Caribbean Maritime University                 | Shipping and Logistics, Nautical Science; Marine transport; Maritime Law; Marine Engineering                                                                                                                                                                                                                                                                                                                                                             |                                                                                                                                                      | no info |
| Jamaica | Caribbean | The International University of the Caribbean | Business Administration, Program and Project Management, Community Development, Psychology, Guidance and Counselling, Human Resource Management, Primary Education, General Studies, Media and Communication, Tourism and Hospitality, Theology                                                                                                                                                                                                          |                                                                                                                                                      | no info |
| Jamaica | Caribbean | University of the Commonwealth Caribbean      | Business and Management, Humanities and Law, Technology and Mathematics,                                                                                                                                                                                                                                                                                                                                                                                 |                                                                                                                                                      | no info |
| Jamaica | Caribbean | Mico University College                       | Humanities and Liberal Arts; Science and Technology; Education                                                                                                                                                                                                                                                                                                                                                                                           | Biology; Chemistry; Environmental Studies; Natural Sciences. Geography,                                                                              | no info |
| Jamaica | Caribbean | Northern Caribbean University                 | Business and Hospitality Management; Education and Leadership; Humanities, Behavioral and Social Sciences; Natural and Applied Sciences; Allied Health and Nursing; Religion and Theology; Graduate Studies and Research; History and Theology, Computer and Information Science,                                                                                                                                                                        | Biology; Chemistry; Environmental Studies; Agriculture, Biochemistry, Geography, Ecology, Marine Biology, Coastal Zone Management, Conservation,     | no info |

|          |           |                                           |                                                                                                                                                                                     |                                                                                                                                                                                               |                                                                                                                                                                                                                                                                                                                                                                                                                                                                                                                                                                                                                                                                                                                           |
|----------|-----------|-------------------------------------------|-------------------------------------------------------------------------------------------------------------------------------------------------------------------------------------|-----------------------------------------------------------------------------------------------------------------------------------------------------------------------------------------------|---------------------------------------------------------------------------------------------------------------------------------------------------------------------------------------------------------------------------------------------------------------------------------------------------------------------------------------------------------------------------------------------------------------------------------------------------------------------------------------------------------------------------------------------------------------------------------------------------------------------------------------------------------------------------------------------------------------------------|
|          |           |                                           | Communication Studies, Dietetics and Nutrition and Food Science                                                                                                                     | Water Resources, Sustainable Development                                                                                                                                                      |                                                                                                                                                                                                                                                                                                                                                                                                                                                                                                                                                                                                                                                                                                                           |
| Jamaica  | Caribbean | The University of the West Indies - Moana | Engineering, Humanities and Education, Law, Medical Sciences, Science and Technology, Social Sciences, Sport, Centre for Marine Science, Nuclear Sciences                           | Biochemistry, Chemistry, Geography, Life Sciences, Biology, Marine Biology, Coastal Ecosystem, Natural Resource Management, Environmental Management, Oceanography, Zoology, Marine Sciences, | <ul style="list-style-type: none"> <li>Wet labs, flow tanks, dissecting microscopes, balances, drying oven, Atomic Spectroscopy, Neutron Activation Analysis Total Reflection X-Ray Fluorescence Spectroscopy, SLOWPOKE-2 research reactor, Gamma Spectroscopy System, PerkinElmer Optima 7000 DV Inductively Coupled Plasma Optical Emission Spectrometer (ICP-OES), Thermo Scientific iCE 3000 Series Atomic Absorption Spectrometer (AAS) with Flame and Graphite Furnace capabilities, CEM MARS5 Microwave Digestion System, Measuring Radiation Thermoluminescence Dosimeter, Tracerco™ NORM Monitor Kit, Norm GM Contamination Monitor, Fixed Area Monitors, Real-time Monitors, Environmental Radiation</li> </ul> |
| Jamaica  | Caribbean | University of Technology                  | Business and Management, Health Sciences, Education and Liberal Studies, Engineering and Computing, Law, Science and Sport, Environment, Medicine, Oral Health, Veterinary Science, | Surveying and Mapping; Biology, Chemistry, Environmental Science, Sustainable Development, Climate Change                                                                                     | no info                                                                                                                                                                                                                                                                                                                                                                                                                                                                                                                                                                                                                                                                                                                   |
| Kiribati | Pacific   | The University of South Pacific           | English, Computer Science, Education, Science, Management and Accounting                                                                                                            |                                                                                                                                                                                               | no info                                                                                                                                                                                                                                                                                                                                                                                                                                                                                                                                                                                                                                                                                                                   |
| Kiribati | Pacific   | Kiribati Institute of Technology          | Automotive Servicing Technology, Business and Community Service, Construction, Electro technology, Plumbing and Metal Roofing, Accounting, Water Plumbing, Nursing                  |                                                                                                                                                                                               | no info                                                                                                                                                                                                                                                                                                                                                                                                                                                                                                                                                                                                                                                                                                                   |
| Maldives | AIS       | Villa College                             | Business Management; Education; Information and Communications Technology; Marine Studies; Shariah and Law, Foundation Studies, Health Sciences                                     | Diving, Aquatic Recreation                                                                                                                                                                    | no info                                                                                                                                                                                                                                                                                                                                                                                                                                                                                                                                                                                                                                                                                                                   |
| Maldives | AIS       | Avid College                              | Business Management; Education; Human Development; Information Technology, Islamic Studies                                                                                          |                                                                                                                                                                                               | no info                                                                                                                                                                                                                                                                                                                                                                                                                                                                                                                                                                                                                                                                                                                   |
| Maldives | AIS       | Cyryx College                             | Business; Humanities and Education; Information Technology; Multimedia Arts and Design                                                                                              |                                                                                                                                                                                               | no info                                                                                                                                                                                                                                                                                                                                                                                                                                                                                                                                                                                                                                                                                                                   |

|                  |         |                                  |                                                                                                                                                                                                                                                                                                                                                                                                                                                                                                    |                                                                                                                            |         |
|------------------|---------|----------------------------------|----------------------------------------------------------------------------------------------------------------------------------------------------------------------------------------------------------------------------------------------------------------------------------------------------------------------------------------------------------------------------------------------------------------------------------------------------------------------------------------------------|----------------------------------------------------------------------------------------------------------------------------|---------|
| Maldives         | AIS     | Islamic University of Maldives   | Arabic; Education' Islamic Revealed Knowledge and Human Science; Shariah and Law                                                                                                                                                                                                                                                                                                                                                                                                                   |                                                                                                                            | no info |
| Maldives         | AIS     | Maldives Business School         | Business Administration, Banking, Information Technology, Human Resource Management, Business Marketing, Multimedia and Advertising, Accounting and Finance, Hospitality Management                                                                                                                                                                                                                                                                                                                |                                                                                                                            | no info |
| Maldives         | AIS     | Mandhu College                   | Business Administration; Education; Information Technology; Law, Teaching                                                                                                                                                                                                                                                                                                                                                                                                                          |                                                                                                                            | no info |
| Maldives         | AIS     | Mianz International College      | Foundation Studies, Business and Management, Language, Education and Arts; Science and Information Technology                                                                                                                                                                                                                                                                                                                                                                                      |                                                                                                                            | no info |
| Maldives         | AIS     | The Maldives National University | Centre for Open Learning; Maritime Studies; Arts; Education; Engineering Technology; Health Science; Hospitality and Tourism Studies; Law; Islamic Studies; Science; Shariah and Law; Business, Nursing, Medicine, Maritime Studies, Foundation Studies                                                                                                                                                                                                                                            | Marine Engineering; Marine Transport; Environmental Management; Water Science, Biology, Chemistry, Marine Science, Ecology | no info |
| Maldives         | AIS     | Zikura International College     | Arts and Humanities; Business; Education                                                                                                                                                                                                                                                                                                                                                                                                                                                           |                                                                                                                            | no info |
| Maldives         | AIS     | Maldives Polytechnic             | Electrician, Small Business Management, Wooden and Fibre Glass Boat Building, Architecture, Costumer Relations and Front Office, Marine Engineering, Civil Engineering, Automotive Engineering, Office Management and Administration                                                                                                                                                                                                                                                               |                                                                                                                            | no info |
| Marshall Islands | Pacific | University of the South Pacific  | Science and Social Science                                                                                                                                                                                                                                                                                                                                                                                                                                                                         | Biology, Chemistry, Geography                                                                                              | no info |
| Marshall Islands | Pacific | College of the Marshall Islands  | Continuing Education, Maritime Vocational Training, Business, Marshallese Studies, Development Education, Nursing and Allied Health, Elementary Education, Liberal Arts, Vocational Education                                                                                                                                                                                                                                                                                                      |                                                                                                                            | no info |
| Mauritius        | AS      | Open University of Mauritius     | Law, Social Work, Law and Management, Library and Information Services, Languages, Business Accounting and Finance, Graphic Design and Multimedia, Communication and Journalism, Business Management, Applied Statistics, Criminology, Economics, Service management, Applied Information and Communication Technology, Marketing, Human Resource Management and Development, Primary Education, Childhood Education, Graphic Design, Computing and Digital Technologies, Business Administration, |                                                                                                                            | no info |

|           |     |                                  |                                                                                                                                                                                                                                              |                                                                                                                      |                                                                                                                                                                                                                                                                                                                                                                                                                                                                                                                                                                                                                                                                                                                                                                                                                                                                                                                                                                                                    |
|-----------|-----|----------------------------------|----------------------------------------------------------------------------------------------------------------------------------------------------------------------------------------------------------------------------------------------|----------------------------------------------------------------------------------------------------------------------|----------------------------------------------------------------------------------------------------------------------------------------------------------------------------------------------------------------------------------------------------------------------------------------------------------------------------------------------------------------------------------------------------------------------------------------------------------------------------------------------------------------------------------------------------------------------------------------------------------------------------------------------------------------------------------------------------------------------------------------------------------------------------------------------------------------------------------------------------------------------------------------------------------------------------------------------------------------------------------------------------|
| Mauritius | AIS | Middlesex University Mauritius   | International Foundation Programme, IT and BIS, Information Technology, Computer Science, Psychology and Counselling, Public Relations and Branding, Accounting and Finance, Business Management, Law,                                       |                                                                                                                      | no info                                                                                                                                                                                                                                                                                                                                                                                                                                                                                                                                                                                                                                                                                                                                                                                                                                                                                                                                                                                            |
| Mauritius | AIS | Université des Mascareignes      | Business and Management, Information and Communication Technology, Sustainable Development and Engineering,                                                                                                                                  |                                                                                                                      | no info                                                                                                                                                                                                                                                                                                                                                                                                                                                                                                                                                                                                                                                                                                                                                                                                                                                                                                                                                                                            |
| Mauritius | AIS | Mahatma Gandhi Institute         | Fine Arts; Indian Studies; Ideological Studies; Mauritian and Area Studies; Performing Arts                                                                                                                                                  |                                                                                                                      | no info                                                                                                                                                                                                                                                                                                                                                                                                                                                                                                                                                                                                                                                                                                                                                                                                                                                                                                                                                                                            |
| Mauritius | AIS | Mauritius Institute of Education | Applied Sciences; Arts and Humanities; Education; Science and Mathematics                                                                                                                                                                    | no info                                                                                                              | no info                                                                                                                                                                                                                                                                                                                                                                                                                                                                                                                                                                                                                                                                                                                                                                                                                                                                                                                                                                                            |
| Mauritius | AIS | Mauritius Institute of Health    | Health Sciences                                                                                                                                                                                                                              |                                                                                                                      | no info                                                                                                                                                                                                                                                                                                                                                                                                                                                                                                                                                                                                                                                                                                                                                                                                                                                                                                                                                                                            |
| Mauritius | AIS | University of Mauritius          | Biomedical and Biomaterials Research; Information Technology and Systems; Innovative Lifelong Learning; Professional Development and Lifelong Learning; Agriculture; Engineering; Law and Management; Science; Social Studies and Humanities | Marine Transport; Fishery; Marine Engineering; Marine Science and Oceanography; Biology; Chemistry; Natural Sciences | Laminar air-flow unit, Research microscopes with facilities for photomicrography. Scanning electron Microscope, PCR, EPIC system, Automatic tissue processor, Rotary microtome and Block master unit Cryostat rotary microtome UV/visible spectrophotometer, Growth Environmental Chamber, Image analysis system, Bioreactor (continuous cell culture), freeze dryer, Autoclaves, ultra-low freezer (- 850C), Ice making machine, Cooling incubators, centrifuges, refrigerated micro-centrifuge, Orbital Refrigerated and illuminated shaker, Environmental Monitoring station, Autoanalyser for nutrients, Fluorimeter, Echosounder, Submarine camera, Total Organic Carbon Analyser, Digital photogrammetric station, water (sea and river) current meter, conductivity temperature, Depth meter (CTD), Fibre glass boat-18ff long with outboard engine, Programmable sequential water Sampler, Biorad vertical protean XII electrophoresis cell with power pack, FTIR spectrometer, UV-Visible |

|                  |         |                                           |                                                                                                                                                                                                                                                                                                                                                                  |                                                                                                                                            |                                                                                                                                                       |
|------------------|---------|-------------------------------------------|------------------------------------------------------------------------------------------------------------------------------------------------------------------------------------------------------------------------------------------------------------------------------------------------------------------------------------------------------------------|--------------------------------------------------------------------------------------------------------------------------------------------|-------------------------------------------------------------------------------------------------------------------------------------------------------|
|                  |         |                                           |                                                                                                                                                                                                                                                                                                                                                                  |                                                                                                                                            | spectrometer, Atomic Absorption spectrometer, GLC, Microwave Digestor, C, H, N and S Analyser, NMR spectrometer, Fluorescence microscope, Centrifuge, |
| Mauritius        | AIS     | University of Technology, Mauritius       | Business, Management and Finance; Health Sciences; Innovative Technologies and Engineering; Sustainable Development and Tourism                                                                                                                                                                                                                                  |                                                                                                                                            | no info                                                                                                                                               |
| Nauru            | Pacific | University of the South Pacific           | Business, Tourism, Hospitality, Arts and Humanities, Community Development, Childhood Education, Counselling, Library and Information System, Information Technology, Office Management                                                                                                                                                                          |                                                                                                                                            | no info                                                                                                                                               |
| Palau            | Pacific | Pacific Islands University                | Biblical Studies, Arts and Liberal Studies, Diving, English                                                                                                                                                                                                                                                                                                      |                                                                                                                                            | no info                                                                                                                                               |
| Palau            | Pacific | Palau Community College                   | Applied Science, Science, Technical Studies, Arts                                                                                                                                                                                                                                                                                                                | Agriculture, Environmental Science, Marine Science, Biology, Chemistry                                                                     | no info                                                                                                                                               |
| Papua New Guinea | Pacific | Divine Word University                    | Arts and Social Science; Business and Informatics; Education; Medicine and Health Sciences                                                                                                                                                                                                                                                                       | Environmental Science                                                                                                                      | no info                                                                                                                                               |
| Papua New Guinea | Pacific | Bulolo Forestry College                   | Sciences and Forestry                                                                                                                                                                                                                                                                                                                                            | Biology, Chemistry, Geology, Physics, Ecology, Biodiversity                                                                                | no info                                                                                                                                               |
| Papua New Guinea | Pacific | Pacific Adventist University              | Arts and Humanities; Business; Education; Health Science; Science; Theology                                                                                                                                                                                                                                                                                      | Biology; Chemistry; Environmental Studies                                                                                                  | no info                                                                                                                                               |
| Papua New Guinea | Pacific | Papua New Guinea University of Technology | Forestry; Timber and Forestry Training College; Agriculture; Applied Physics; Applied Sciences; Architecture and Building Science; Business Studies; Civil Engineering; Electrical and Communication Engineering; Forestry; Language and Communication; Mathematics and Computer Science; Mechanical Engineering; Mining Engineering; Surveying and Land Studies | Natural Sciences; Surveying and Mapping, Chemistry                                                                                         | no info                                                                                                                                               |
| Papua New Guinea | Pacific | University of Goroka                      | Education; Humanities. Science and Technology, Vocational Education                                                                                                                                                                                                                                                                                              | Biology, Chemistry, Agriculture, Environmental Chemistry, Zoology, Chemical Ecology, Biochemistry, Biodiversity                            | no info                                                                                                                                               |
| Papua New Guinea | Pacific | University of Papua New Guinea            | Business and Public Policy, Humanities and Social Sciences, Law, Medicine and Health Sciences, Natural and Physical Sciences                                                                                                                                                                                                                                     | Development Studies; Biology; Chemistry; Environmental Studies; Geology; Geography, Sustainable Development, Biodiversity, Climate Change, | Seawater tanks                                                                                                                                        |

|                       |         |                                                                            |                                                                                                                                                                                                                                                                                        |                                                                                                                                                                                                                            |         |
|-----------------------|---------|----------------------------------------------------------------------------|----------------------------------------------------------------------------------------------------------------------------------------------------------------------------------------------------------------------------------------------------------------------------------------|----------------------------------------------------------------------------------------------------------------------------------------------------------------------------------------------------------------------------|---------|
|                       |         |                                                                            |                                                                                                                                                                                                                                                                                        | Disaster Reduction, Marine Life, Oceanography, Fisheries                                                                                                                                                                   |         |
| Papua New Guinea      | Pacific | Papua New Guinea University of Natural Resources and Environment           | Agriculture, Fisheries and Marine Resource Management, Tropical Forestry, Tourism and Business,                                                                                                                                                                                        | Biology, Chemistry, Agriculture, Fisheries, Natural Resource Conservation, Aquaculture, Aquatic Ecosystems, Marine Biology, Ecology, Marine Resource Management, Limnology, Oceanography, Climate Change, Marine Pollution | no info |
| Samoa                 | Pacific | National University of Samoa                                               | Samoa Studies; Business and Entrepreneurship; Applied Science; Arts; Technical Education; Science, Health Science, Maritime Training                                                                                                                                                   | Environmental Management; Geography; Biology; Chemistry; Nautical Science, Environmental Science, Sustainable Agriculture, Marine Ecology, Coral Reef Ecology, Climate Change, Disaster Management                         | no info |
| Samoa                 | Pacific | University of the South Pacific, School of Agriculture and Food Technology | Agricultural Economics, Extension and Education; Animal Science; Crop Science; Soil Science and Agricultural Engineering; Extension and Training in Agriculture, Law, Arts, Education, Business and Economics, Technology and Environment, Sustainable Development                     | Agriculture, Environmental Studies                                                                                                                                                                                         | no info |
| Samoa                 | Pacific | American Samoa Community College                                           | Liberal Arts, Teacher Training, Vocational-technical Education, General education                                                                                                                                                                                                      |                                                                                                                                                                                                                            | no info |
| Sao Tome and Principe | AIS     | University of São Tomé and Príncipe                                        | Agronomy; Economics; Education; Engineering; Health sciences; History; Law; Modern Languages; Natural Sciences; Public Relations and Communications                                                                                                                                    | Biology, Geography, Natural Sciences                                                                                                                                                                                       | no info |
| Seychelles            | AIS     | University of Seychelles                                                   | Arts and Social Development; Business and Sustainable Development; Enterprise and Professional Development, Blue Economy, Languages, Tourism Management, Marine Science and Sustainability, Environmental Science, Leadership, Computing, Journalism, Administration, Social Work, Law | Environmental Management, Marine Science, Sustainability, Marine Ecology, Natural Resources, Biology, Fisheries, Aquaculture                                                                                               | no info |
| Seychelles            | AIS     | Seychelles Polytechnic                                                     | Business and Secretarial Studies, Visual Arts, Economic and Social Studies, Finance                                                                                                                                                                                                    |                                                                                                                                                                                                                            | no info |
| Singapore             | AIS     | LASALLE College of the Arts                                                | Contemporary Music; Creative Industries; Dance and Theatre; Design Communication; Fashion; Film                                                                                                                                                                                        |                                                                                                                                                                                                                            | no info |

|           |     |                                  |                                                                                                                                                                                                                                                                                      |                                                                                                                                                                                                                                                                                                                                                                                                                                                                                                                                                                                                                                                                                                                                                                                                                                                                                                        |
|-----------|-----|----------------------------------|--------------------------------------------------------------------------------------------------------------------------------------------------------------------------------------------------------------------------------------------------------------------------------------|--------------------------------------------------------------------------------------------------------------------------------------------------------------------------------------------------------------------------------------------------------------------------------------------------------------------------------------------------------------------------------------------------------------------------------------------------------------------------------------------------------------------------------------------------------------------------------------------------------------------------------------------------------------------------------------------------------------------------------------------------------------------------------------------------------------------------------------------------------------------------------------------------------|
|           |     |                                  | and Animation; Fine Arts; Spatial and Product Design                                                                                                                                                                                                                                 |                                                                                                                                                                                                                                                                                                                                                                                                                                                                                                                                                                                                                                                                                                                                                                                                                                                                                                        |
| Singapore | AIS | Nanyang Academy of Fine Arts     | Lifelong Education; Art and Design; Arts Management, Dance and Theatre; Music, Fashion                                                                                                                                                                                               | no info                                                                                                                                                                                                                                                                                                                                                                                                                                                                                                                                                                                                                                                                                                                                                                                                                                                                                                |
| Singapore | AIS | Nanyang Technological University | Engineering; Humanities, Arts and Social Sciences; Science; Education; Business; International Studies; Medicine                                                                                                                                                                     | Bioreactors, Epifluorescence Microscopes, Super resolution Microscope, Illumina MiSeq Sequencers, Pacific Biosciences RSII single-molecule Sequencer, Bioflumes, Resolution and accurate Mass Spectrometry, Imaging Mass Spectrometry, NMR and UPLC-MS, Transmission Electron Microscope, Liquid Chromatography Quadrupole Time-Of-Flight Mass Spectrometer (LC-QTOF), Confocal Microscope, Triple Quad Liquid Chromatography Mass Spectrometer (LC-MS), Anaerobic Chamber, Class Biosafety Cabinet, Microwave Plasma Atomic Emission Spectrophotometer (MP-AES), Lightcycler 480, Particle Size analyser, Thermal Cycler, MagNA Pure System, Cryostat, Gel-Documentation System, Gas Chromatography Mass Spectrometer (GC-MS), Voltammetry, Metal-free Chemistry Clean Room, MC-ICP-MS, Thermo ICP-OES, a Picarro water analyzer L2130-i, and a Picarro water analyzer L2140-i, Centrifuges, XRD, XRF |
| Singapore | AIS | National University of Singapore | Music; Arts and Social Sciences; Dentistry; Engineering; Law; Medicine; Science; University Scholars programme; Yale-NUS College; Integrative Sciences and Engineering; Public Health; Public Policy; Business; Computing; Design and Environment; Duke-NUS Medical School; Medicine | Applied Chemistry, Biology; Chemistry; Natural Sciences; Biological and Life Sciences; Maritime Law; Marine Engineering; Water Management, Biodiversity                                                                                                                                                                                                                                                                                                                                                                                                                                                                                                                                                                                                                                                                                                                                                |



|           |     |                                                                                                 |                                                                                                                                                                                                                                                                                                                                                                                                                                |                                                                                                    |                                                                                                                                                                                                                                                                                                                                                                                                                                                                                                                                                                                                                                                                                                                                                                                                                                                                                                                                                                |
|-----------|-----|-------------------------------------------------------------------------------------------------|--------------------------------------------------------------------------------------------------------------------------------------------------------------------------------------------------------------------------------------------------------------------------------------------------------------------------------------------------------------------------------------------------------------------------------|----------------------------------------------------------------------------------------------------|----------------------------------------------------------------------------------------------------------------------------------------------------------------------------------------------------------------------------------------------------------------------------------------------------------------------------------------------------------------------------------------------------------------------------------------------------------------------------------------------------------------------------------------------------------------------------------------------------------------------------------------------------------------------------------------------------------------------------------------------------------------------------------------------------------------------------------------------------------------------------------------------------------------------------------------------------------------|
| Singapore | AIS | Singapore Institute of Technology                                                               | Chemical Engineering and Food Technology; Design and Specialized Business; Engineering; Health and Social Sciences; Infocomm Technology                                                                                                                                                                                                                                                                                        | Marine Engineering                                                                                 | no info                                                                                                                                                                                                                                                                                                                                                                                                                                                                                                                                                                                                                                                                                                                                                                                                                                                                                                                                                        |
| Singapore | AIS | Singapore Management University                                                                 | Accountancy; Business; Economics; Information Systems; Law; Social Sciences, Computer Science                                                                                                                                                                                                                                                                                                                                  |                                                                                                    | no info                                                                                                                                                                                                                                                                                                                                                                                                                                                                                                                                                                                                                                                                                                                                                                                                                                                                                                                                                        |
| Singapore | AIS | Singapore University of Social Sciences                                                         | Business; Human Development; Humanities and Behavioral Sciences; Law; Lifelong and Experiential Learning; Science and Technology                                                                                                                                                                                                                                                                                               | Natural Sciences                                                                                   | no info                                                                                                                                                                                                                                                                                                                                                                                                                                                                                                                                                                                                                                                                                                                                                                                                                                                                                                                                                        |
| Singapore | AIS | Singapore University of Technology and Design                                                   | Architecture and Sustainable Development; Engineering Product Development; Engineering Systems and Design; Humanities, Arts, and Social Sciences; Information Systems Technology and Design, Urban Science, Policy,                                                                                                                                                                                                            | Chemistry, Biology                                                                                 | Class 1000 cleanroom                                                                                                                                                                                                                                                                                                                                                                                                                                                                                                                                                                                                                                                                                                                                                                                                                                                                                                                                           |
| Singapore | AIS | <a href="https://www.sp.edu.sg/">https://www.sp.edu.sg/</a>                                     | School of Architecture and the Built Environment, School of business, School of Chemical and Life Sciences, School of Computing, School of Electrical and Electronic Engineering, School of Life Skills and Communication, Media Arts and Design School, School of Mechanical and Aeronautical Engineering, School of Mathematics and Science, Singapore Maritime Acedemy, Professional and Adult Continuing Education Academy | Chemistry, Microbiology, Applied Science, Chemical Engineering, Mathematics, Physics, Engineering, | Rheometers, Brookfield viscometers, supercritical fluid extractor and a multidimensional GC-MS, autoanalysers, microplate readers, brightfield (single and multiheaded) and fluorescence microscopes, conventional and real-time thermal cyclers, pulsed field gel electrophoresis system, DNA sequencing system and flow cytometer, UV-visible and atomic absorption spectrophotometries, fluorimetry, potentiometer, HPLC, FTI, Electrophoresis, aniline point apparatus, SOTAX AT7 dissolution testing unit, Pharmatest machine and Silverstone mixer, Kjeldahl digestor, microwave furnace, fat analysers and water activity meter, bomb calorimeter, fatty acid analyser, water activity meter, colorimeter, vapour pressure osmometer, X-ray fluorescence spectrophotometer, scanning electron microscope, tensile tester, differential scanning calorimeter, Fourier transform infrared (FTIR) spectroscope, light scattering nanoparticle measurement. |
| Singapore | AIS | <a href="https://www.np.edu.sg/Pages/default.aspx">https://www.np.edu.sg/Pages/default.aspx</a> | Business and Accountancy, Design and Environment, Engineering, Film and Media Studies.                                                                                                                                                                                                                                                                                                                                         | Marine Offshore Technology, Environmental and Water                                                | SEM, Development of unmanned underwater vehicles (ROVs and AUVs),                                                                                                                                                                                                                                                                                                                                                                                                                                                                                                                                                                                                                                                                                                                                                                                                                                                                                              |

|           |     |                      |                                                                                                                                                                                                                                                               |                                                                                                                 |                                                                                                                                                                                                                                                                                                                                                                                                                                                                                                                                                                                                                                                                                                                                                                                                                                                                                                                                                                                                                |
|-----------|-----|----------------------|---------------------------------------------------------------------------------------------------------------------------------------------------------------------------------------------------------------------------------------------------------------|-----------------------------------------------------------------------------------------------------------------|----------------------------------------------------------------------------------------------------------------------------------------------------------------------------------------------------------------------------------------------------------------------------------------------------------------------------------------------------------------------------------------------------------------------------------------------------------------------------------------------------------------------------------------------------------------------------------------------------------------------------------------------------------------------------------------------------------------------------------------------------------------------------------------------------------------------------------------------------------------------------------------------------------------------------------------------------------------------------------------------------------------|
|           |     |                      | Health Sciences, Humanities and Social Sciences, InfoCOMM Technology, Interdisciplinary Studies, Life Sciences and Chemical Technology, Environmental and Water Technology Centre of Innovation, Centre of innovation Marine and Offshore Technology          | technology, Landscape Design and horticulture, Chemical and Micromolecular Engineering, Molecular Biotechnology |                                                                                                                                                                                                                                                                                                                                                                                                                                                                                                                                                                                                                                                                                                                                                                                                                                                                                                                                                                                                                |
| Singapore | AIS | Nanyang Polytechnic  | School of Business Management, School of Engineering, School of Interactive and Digital Media, School of Chemical and Life Sciences, School of Health and Social Sciences, Foundation and general Studies, School of Design, School of Information Technology | Chemical and Green Technology,                                                                                  | Rheology analyzer, humidity chambers, colorimeter for color analysis, pH meter, microscope, reverse osmosis water set-up, fermenters/bioreactors, automated DNA sequencing, DNA microarray, proteomics, confocal microscopy, real-time thermocyclers, HPLC and GC-MS, Particle sizing systems, Sieve analysis apparatus                                                                                                                                                                                                                                                                                                                                                                                                                                                                                                                                                                                                                                                                                        |
| Singapore | AIS | Republic Polytechnic | Applied Science, School of Engineering, School of Hospitality, School of Infocomm, School of Management and Communication, School of Sports Health and Leisure,                                                                                               | Common Science Program, Biotechnology, Environmental Science, Marine Science and Aquaculture,                   | Texture analyser, differential scanning calorimeter, rheometer, inductively coupled plasma - optical emission spectrometer, total organic carbon and total nitrogen analyser, coral tanks, outdoor circular fibreglass tanks, and 48 indoor experimental tanks with ultraviolet light and temperature control capabilities, Thermal analysers, Gas analyser, Atomic force microscope, Field emission scanning electron microscope, UV-vis spectrometers, Polarisation microscope, Resistivity and impedance analysers, Current voltage measurement equipment attached with probe system, DC-RF sputtering system, Particle size analyser, High energy mechanical miller, high temperature furnaces, Sol-gel processing equipment and spin coater, liquid and gas chromatography, viscometry, Karl Fischer Titration, loss on drying method, thermogravimetric analysis (TGA), differential scanning calorimeter, mass spectrometry, and spectroscopy methods such as Fourier Transform Infrared (FTIR), Liquid |

|                     |           |                                                         |                                                                                                                                                                                                                                                                                                                                                                                                                                           |                                                                                                                                                                                    |                                                                                                                                 |
|---------------------|-----------|---------------------------------------------------------|-------------------------------------------------------------------------------------------------------------------------------------------------------------------------------------------------------------------------------------------------------------------------------------------------------------------------------------------------------------------------------------------------------------------------------------------|------------------------------------------------------------------------------------------------------------------------------------------------------------------------------------|---------------------------------------------------------------------------------------------------------------------------------|
|                     |           |                                                         |                                                                                                                                                                                                                                                                                                                                                                                                                                           |                                                                                                                                                                                    | chromatography-mass spectrometry, NMR, atomic absorption spectroscopy (AAS), and inductively coupled plasma spectroscopy (ICP). |
| Singapore           | AIS       | Temasek Polytechnic                                     | School of Applied Science, School of Design, School of Humanities and Social Sciences, Centre of Foundation Studies, School of Business, School of Engineering, School of Informatics and IT, Aquaculture Innovation Centre and Veterinary Science, Centre for Applied Nutrition Services, Centre of innovation of Complementary Health Products, Centre for Research and opportunities in Plant Science, Centre for Urban Sustainability | Chemical Engineering, Aquaculture                                                                                                                                                  | no info                                                                                                                         |
| Singapore           | AIS       | Institute of Technical Education                        | School of Design and Media, School of Electronics and Infocomm Technology, School of Engineering, School of Business and Services, School of Applied and Health Sciences, School of Hospitality                                                                                                                                                                                                                                           | Biotechnology, Offshore and Marine Technology,                                                                                                                                     | no info                                                                                                                         |
| Solomon Islands     | Pacific   | Solomon Islands National University                     | Business and Management; Technology and Maritime Studies, Education and Humanities; Natural Resources and Applied Sciences; Nursing and Allied Health Studies                                                                                                                                                                                                                                                                             | Natural Resources, Fishery, Environmental Studies<br>Agriculture, Waste Management, Climate Change, Sustainable Development, Aquaculture, Marine Ecology, Chemistry, Water quality | no info                                                                                                                         |
| Solomon Islands     | Pacific   | University of the South Pacific, Solomon Islands Campus | Agriculture; Humanities; Law; Pure and Applied Sciences; Social and Economic Development                                                                                                                                                                                                                                                                                                                                                  | Natural Sciences, Marine Science and Oceanography; Natural Resources                                                                                                               | no info                                                                                                                         |
| Solomon Islands     | Pacific   | Solomon Islands College of Higher Education             | Industrial Development, Natural Resources, Finance and Administration, Humanities, Science and Arts, Nursing and Health Science, Education, Marine and Fisheries Studies, Tourism and Hospitality.                                                                                                                                                                                                                                        | Agriculture, Environmental Studies, Ecology, Climate Change, Geography, Biodiversity, Pollution Control, Disaster Management, Fishery                                              | no info                                                                                                                         |
| St. Kitts and Nevis | Caribbean | Clarence Fitzroy Bryant College                         | Health Sciences, Teacher Education, Technical Vocational Education and Management Studies, Arts and General Studies, Continuing Adult Education                                                                                                                                                                                                                                                                                           | Chemistry, Physics, Biology                                                                                                                                                        | no info                                                                                                                         |
| St. Kitts and Nevis | Caribbean | International University of Health Sciences             | Medical and Health Science                                                                                                                                                                                                                                                                                                                                                                                                                |                                                                                                                                                                                    | no info                                                                                                                         |
| St. Kitts and Nevis | Caribbean | Medical University of the Americas                      | Medical and Health Science                                                                                                                                                                                                                                                                                                                                                                                                                |                                                                                                                                                                                    | no info                                                                                                                         |
| St. Kitts and Nevis | Caribbean | The Ross University Schools of Veterinary Medicine      | Medical and Health Science                                                                                                                                                                                                                                                                                                                                                                                                                |                                                                                                                                                                                    | no info                                                                                                                         |

|                                |           |                                                           |                                                                                                                                                                                                                                             |                                                                                               |         |
|--------------------------------|-----------|-----------------------------------------------------------|---------------------------------------------------------------------------------------------------------------------------------------------------------------------------------------------------------------------------------------------|-----------------------------------------------------------------------------------------------|---------|
| St. Kitts and Nevis            | Caribbean | University of West Indies Branch                          | Management, Conflict and Communication, Excel, Finance, Human Resource Management, Writing and Communication, Psychology                                                                                                                    |                                                                                               | no info |
| St. Kitts and Nevis            | Caribbean | Windsor University School of Medicine                     | Medical and Health Science                                                                                                                                                                                                                  |                                                                                               | no info |
| St. Kitts and Nevis            | Caribbean | Panamerican University                                    | Natural Medicine                                                                                                                                                                                                                            |                                                                                               | no info |
| St. Kitts and Nevis            | Caribbean | Caribbean Agricultural Research and Development Institute | Agriculture                                                                                                                                                                                                                                 |                                                                                               | no info |
| St. Lucia                      | Caribbean | College of Medicine and Health Science                    | Medical and Health Science                                                                                                                                                                                                                  |                                                                                               | no info |
| St. Lucia                      | Caribbean | Destiny University School of Medicine and Health Sciences | Tropical Medicine and Infectious Disease, General Internal Medicine                                                                                                                                                                         |                                                                                               | no info |
| St. Lucia                      | Caribbean | Sir Arthur Lewis Community College                        | Arts and Humanities, Building, Business, Continuing Education, Curriculum Development, Electrical and Electronic Engineering, Technology, Health Science, Hospitality and Tourism, Mathematics and Natural Sciences, Mechanical Engineering | Biology, Chemistry, Geography, Physics, Environmental Science, Agriculture                    | no info |
| St. Lucia                      | Caribbean | Spartan Health Science University School of Medicine      | Medical and Health Science                                                                                                                                                                                                                  |                                                                                               | no info |
| St. Lucia                      | Caribbean | University of West Indies, School of Continuing Studies   | Management, Computer Science, Theatre Arts and Education, Events Management, Costumer Service, Visual Arts, Project Management, Speaking and Presentation Skills, Counselling, Sales and marketing                                          |                                                                                               | no info |
| St. Lucia                      | Caribbean | Monroe College                                            | Allied Health, Business and Accounting, Criminal Justice, Culinary, Hospitality Management, Education, Information Technology, Nursing                                                                                                      |                                                                                               | no info |
| St. Lucia                      | Caribbean | American International Medical University                 | Medicine, Nursing                                                                                                                                                                                                                           |                                                                                               | no info |
| St. Lucia                      | Caribbean | International American University College of Medicine     | Basic and Clinical Science                                                                                                                                                                                                                  |                                                                                               | no info |
| St. Lucia                      | Caribbean | National Research and Development Foundation              | Business Management, Human Resources, Marketing                                                                                                                                                                                             |                                                                                               | no info |
| St. Vincent and the Grenadines | Caribbean | St Vincent Community College                              | Accounting, Computer Science, Environmental Science, Natural Science, Economics, French, History, Law, Management, Sociology, Spanish, Nursing, Engineering, Business, Hospitality, Agriculture                                             | Biology, Chemistry, Environmental Science, geography, Green Engineering, Physics, Agriculture | no info |

|                                |           |                                                           |                                                                                                                                                                                                                                                         |                                                                                                                                     |         |
|--------------------------------|-----------|-----------------------------------------------------------|---------------------------------------------------------------------------------------------------------------------------------------------------------------------------------------------------------------------------------------------------------|-------------------------------------------------------------------------------------------------------------------------------------|---------|
| St. Vincent and the Grenadines | Caribbean | All Saints University College of Medicine                 | Medical and Health Science                                                                                                                                                                                                                              |                                                                                                                                     | no info |
| St. Vincent and the Grenadines | Caribbean | St James School of Medicine                               | Basic Science, Clinical Science                                                                                                                                                                                                                         |                                                                                                                                     | no info |
| St. Vincent and the Grenadines | Caribbean | Saint Teresa University                                   | Yoga, Business, Medicine, Information Science, Computer Science, Information Technology, Corporate Excellence and Leadership,                                                                                                                           |                                                                                                                                     | no info |
| St. Vincent and the Grenadines | Caribbean | American University of St Vincent                         | Pre-med, Basic Science, Clinical Science                                                                                                                                                                                                                |                                                                                                                                     | no info |
| St. Vincent and the Grenadines | Caribbean | Trinity School of Medicine                                | Medical and Health Science                                                                                                                                                                                                                              |                                                                                                                                     | no info |
| St. Vincent and the Grenadines | Caribbean | Caribbean Agricultural Research and Development Institute | Agriculture                                                                                                                                                                                                                                             |                                                                                                                                     | no info |
| St. Vincent and the Grenadines | Caribbean | University of the West Indies Open Campus                 | Law, Computers, English, Management, Counselling, Maritime Collision and Prevention, Shipping and Logistics                                                                                                                                             |                                                                                                                                     | no info |
| Suriname                       | Caribbean | Anton de Kom University of Suriname                       | Applied Technology; Development Planning and Management; Social Studies; Graduate Studies and Research; Medical Sciences; Social Sciences; Suriname Agricultural Research Centre; Technological Sciences, Humanities, Mathematical and Physical Science | Aquaculture; Environmental Management; Geology; Natural Resources; Water Management, Agriculture, Environmental Resources Chemistry | no info |
| Timor-Leste                    | Pacific   | Canossa Professional Institute                            | Computer Engineering; Informatics Engineering; Office Management                                                                                                                                                                                        |                                                                                                                                     | no info |
| Timor-Leste                    | Pacific   | Dili Institute of Technology                              | Engineering and Science, Business and Management, Petroleum Studies, Tourism and Hospitality                                                                                                                                                            | Geology, Chemical Engineering, Environmental Engineering, Marine Engineering, Fishing Engineering                                   | no info |
| Timor-Leste                    | Pacific   | Dili University                                           | Economy; Educational Sciences; Engineering; Law; Political Sciences; Public Health                                                                                                                                                                      |                                                                                                                                     | no info |
| Timor-Leste                    | Pacific   | Institute of Business                                     | Economics and Business; Hospitality and Tourism; Information Communication and Technology; Postgraduate                                                                                                                                                 |                                                                                                                                     | no info |
| Timor-Leste                    | Pacific   | Instituto Superior Cristal                                | Health Sciences Education; Teacher Training and Education                                                                                                                                                                                               | Chemistry, Biology                                                                                                                  | no info |
| Timor-Leste                    | Pacific   | National University of Timor Leste                        | Agriculture; Economics; Educational Sciences; Engineering; Exact and Social Sciences; Health Sciences; Law; Philosophy; Social and Political Sciences, Science and Technology                                                                           | Natural Sciences, Climate Change, Biodiversity                                                                                      | no info |

|                     |           |                                                         |                                                                                                                                                                                                                                                                                                                                                                        |                                                                                                                                                                            |                                                                                                                                                                                                           |
|---------------------|-----------|---------------------------------------------------------|------------------------------------------------------------------------------------------------------------------------------------------------------------------------------------------------------------------------------------------------------------------------------------------------------------------------------------------------------------------------|----------------------------------------------------------------------------------------------------------------------------------------------------------------------------|-----------------------------------------------------------------------------------------------------------------------------------------------------------------------------------------------------------|
| Timor-Leste         | Pacific   | Oriental University of Timor Leste                      | Agriculture; Economics; Educational Sciences; Engineering; Health and Sciences; Law; Natural Resources and Mineral; Social and Politics                                                                                                                                                                                                                                | Fishery; Development Studies                                                                                                                                               | no info                                                                                                                                                                                                   |
| Timor-Leste         | Pacific   | São Tomás de Aquino Religious Sciences Institute        | Teacher Training                                                                                                                                                                                                                                                                                                                                                       |                                                                                                                                                                            | no info                                                                                                                                                                                                   |
| Timor-Leste         | Pacific   | University of Peace                                     | Agriculture Technology; Economics; Engineering; Law; Master Degree; Public Health; Social Sciences and Humanities                                                                                                                                                                                                                                                      | Development Studies                                                                                                                                                        | no info                                                                                                                                                                                                   |
| Tonga               | Pacific   | University of the South Pacific Tonga Centre            | Extension Studies/Continuing Education                                                                                                                                                                                                                                                                                                                                 |                                                                                                                                                                            | no info                                                                                                                                                                                                   |
| Tonga               | Pacific   | Atenisi Institute                                       | Humanities, Natural Science, Social Science, Arts                                                                                                                                                                                                                                                                                                                      | Marine Zoology, Marine Environments, Marine Chemistry                                                                                                                      | no info                                                                                                                                                                                                   |
| Tonga               | Pacific   | The Commonwealth Vocational University                  | Commerce, Computer Science, Hospitality and Tourism, Education and Teaching                                                                                                                                                                                                                                                                                            |                                                                                                                                                                            | no info                                                                                                                                                                                                   |
| Tonga               | Pacific   | King's International University                         | Religion and Theology, Engineering and Technology, Science, Arts and Literature, Commerce and Law. Social Sciences, Agriculture and Environmental Sciences, Pacific Island Studies                                                                                                                                                                                     | Biology, Chemistry, Earth Sciences, Conservation, Environmental Science                                                                                                    | no info                                                                                                                                                                                                   |
| Tonga               | Pacific   | Hango Agricultural College Tonga                        | Agriculture                                                                                                                                                                                                                                                                                                                                                            |                                                                                                                                                                            | no info                                                                                                                                                                                                   |
| Tonga               | Pacific   | Tonga Institute of Higher Education                     | Accounting, Information Technology, Agricultural Science, Media and Journalism, Tourism and Hospitality                                                                                                                                                                                                                                                                |                                                                                                                                                                            | no info                                                                                                                                                                                                   |
| Tonga               | Pacific   | University of the Nations                               | Christianity                                                                                                                                                                                                                                                                                                                                                           |                                                                                                                                                                            | no info                                                                                                                                                                                                   |
| Trinidad and Tobago | Caribbean | Arthur Lok Jack Graduate School of Business             | Business Administration; Port and Maritime Management, Human Resource management, Institutional Innovation and Effectiveness, Strategic Marketing, Information System and Technology Management, Sustainable Energy Management, International Finance, Medium and Enterprise Management, Business Development and Innovation, Business Intelligence and Data Analytics | Maritime Transport                                                                                                                                                         | no info                                                                                                                                                                                                   |
| Trinidad and Tobago | Caribbean | Caribbean Nazarene College                              | Arts and Counselling, Social Work, Christian Education, Management and Human Resources, Music, Psychology, Early Childhood Care, Primary Education, Theological Studies                                                                                                                                                                                                |                                                                                                                                                                            | no info                                                                                                                                                                                                   |
| Trinidad and Tobago | Caribbean | The University of the West Indies, St. Augustine Campus | Business; Engineering; Food and Agriculture; Gender and Development Studies; Humanities and Education; International Relations; Law; Medical Sciences; Science and Technology; Seismic Research; Social and Economic Studies; Social Sciences                                                                                                                          | Surveying and Mapping; Water Management; Ecology; Geography; Natural Resources; Biochemistry; Biology; Chemistry; Environmental Management; Environmental Studies; Zoology | Centrifuges, incubators, pH Meters, microcalorimeter, NMR spectrometer, FTIR Spectrometer, Diode-Array Spectrometer UV-VIS spectrometer, Nuclear Quadrupole Double Resonance Spectrometer, GC and LC Mass |

|                     |           |                                               |                                                                                                                                                                                                                                                                                                                                                  |                                                                                                                                                                                                                                                                |                                                                                                                                                                                                                                                               |
|---------------------|-----------|-----------------------------------------------|--------------------------------------------------------------------------------------------------------------------------------------------------------------------------------------------------------------------------------------------------------------------------------------------------------------------------------------------------|----------------------------------------------------------------------------------------------------------------------------------------------------------------------------------------------------------------------------------------------------------------|---------------------------------------------------------------------------------------------------------------------------------------------------------------------------------------------------------------------------------------------------------------|
|                     |           |                                               |                                                                                                                                                                                                                                                                                                                                                  |                                                                                                                                                                                                                                                                | Spectrometers, Rapid Stopped-flow Kinetic Spectrometer, Perkin-Elmer Fluorescence Spectrometer, ICP-MS, Varian Atomic Absorption Spectrometer with graphite furnace, Jasco Model J-720S spectropolarimeter, microscope, SEM, KSV Langmuir-Blodgett apparatus, |
| Trinidad and Tobago | Caribbean | University of the Southern Caribbean          | Business; Education and Human Sciences; Humanities; Science and Technology; Social Sciences; Theology and Religion                                                                                                                                                                                                                               | Biology; Biophysics; Zoology, Chemistry                                                                                                                                                                                                                        | no info                                                                                                                                                                                                                                                       |
| Trinidad and Tobago | Caribbean | University of Trinidad and Tobago             | Arts and Education; Engineering; Graduate Studies; Sciences                                                                                                                                                                                                                                                                                      | Biological and Life Sciences, Environmental Management; Environmental Studies; Marine Science and Oceanography, Marine Transport; Nautical Science, Aquaculture, Fisheries, Tropical and Marine Ecosystems, Ocean and Coastal Management, Marine Biotechnology | no info                                                                                                                                                                                                                                                       |
| Tuvalu              | Pacific   | University of South Pacific                   | Arts, Law, Education, Business, Economics, Science and Technology, Environmental Science, Humanities, Tourism, hospitality, Sustainable Development                                                                                                                                                                                              | Climate Change, Ocean Resources Management, Sustainable Fisheries, Geography, Biology, Chemistry                                                                                                                                                               | no info                                                                                                                                                                                                                                                       |
| Vanuatu             | Pacific   | University of the South Pacific Emalus Campus | Teaching, Tourism, Journalism, Literature, Linguistics, Agriculture, Science and Environmental Management, Geospatial Science, Technology, Computing and Information Systems, Accounting and Economics, Law and Politics, Banking and Finance, Public Administration and Management, Land Management, Counselling and Social Sciences, Chemistry | Environmental Sciences, Chemistry, Biology, Marine Management, Marine Science, Sustainable Development                                                                                                                                                         | no info                                                                                                                                                                                                                                                       |

## References

1. World Bank. *World Development Indicators*; The World Bank Group: Washington, DC, USA, 2019. Available online: [data.worldbank.org/indicator/EN.ATM.CO2E.PC](https://data.worldbank.org/indicator/EN.ATM.CO2E.PC) (accessed on 1 October 2019).
2. UN. Draft Outcome Document of the United Nations Summit for the Adoption of the Post-2015 Development Agenda. Draft Resolution Submitted by the President of the General Assembly, Sixty-Ninth Session, Agenda Items 13 (a) and 115, A/69/L.85, August 12, 2015; UN: New York, NY, USA, 2015.
3. UN. Small Island Developing States. Available online: <https://sustainabledevelopment.un.org/topics/sids/list>. (accessed on 3 July 2020)
4. Baldacchino, G. Seizing history: development and non-climate change in Small Island Developing States. *Int. J. Clim. Chang. Strateg. Manag.* **2018**, doi:10.1108/IJCCSM-02-2017-0037.
5. *The World Factbook*; Central Intelligence Agency: Washington, DC, USA, 2019. Available online: <https://www.cia.gov/library/publications/resources/the-world-factbook/index.html> (accessed on 1 October 2019).
